# Supplementary material
Source: PubMed Central journal article supplement (PMC3064748)

**Enantio- and Diastereoselective Synthesis of (*E*)-1,5-*syn*-Diols: Application to the C(23)-C(40) Fragment of Tetrafibricin**

Jeremy Kister, Philippe Nuhant, Ricardo Lira, Achim Sorg and William R. Roush

Department of Chemistry, Scripps Florida, Jupiter, Florida 33458

E-mail: [roush@scripps.edu](mailto:roush@scripps.edu)

**SUPPORTING INFORMATION - <sup>1</sup>H and <sup>13</sup>C Spectra**

$^1\text{H}$  NMR (400 MHz,  $\text{CDCl}_3$ ) of compound **8**

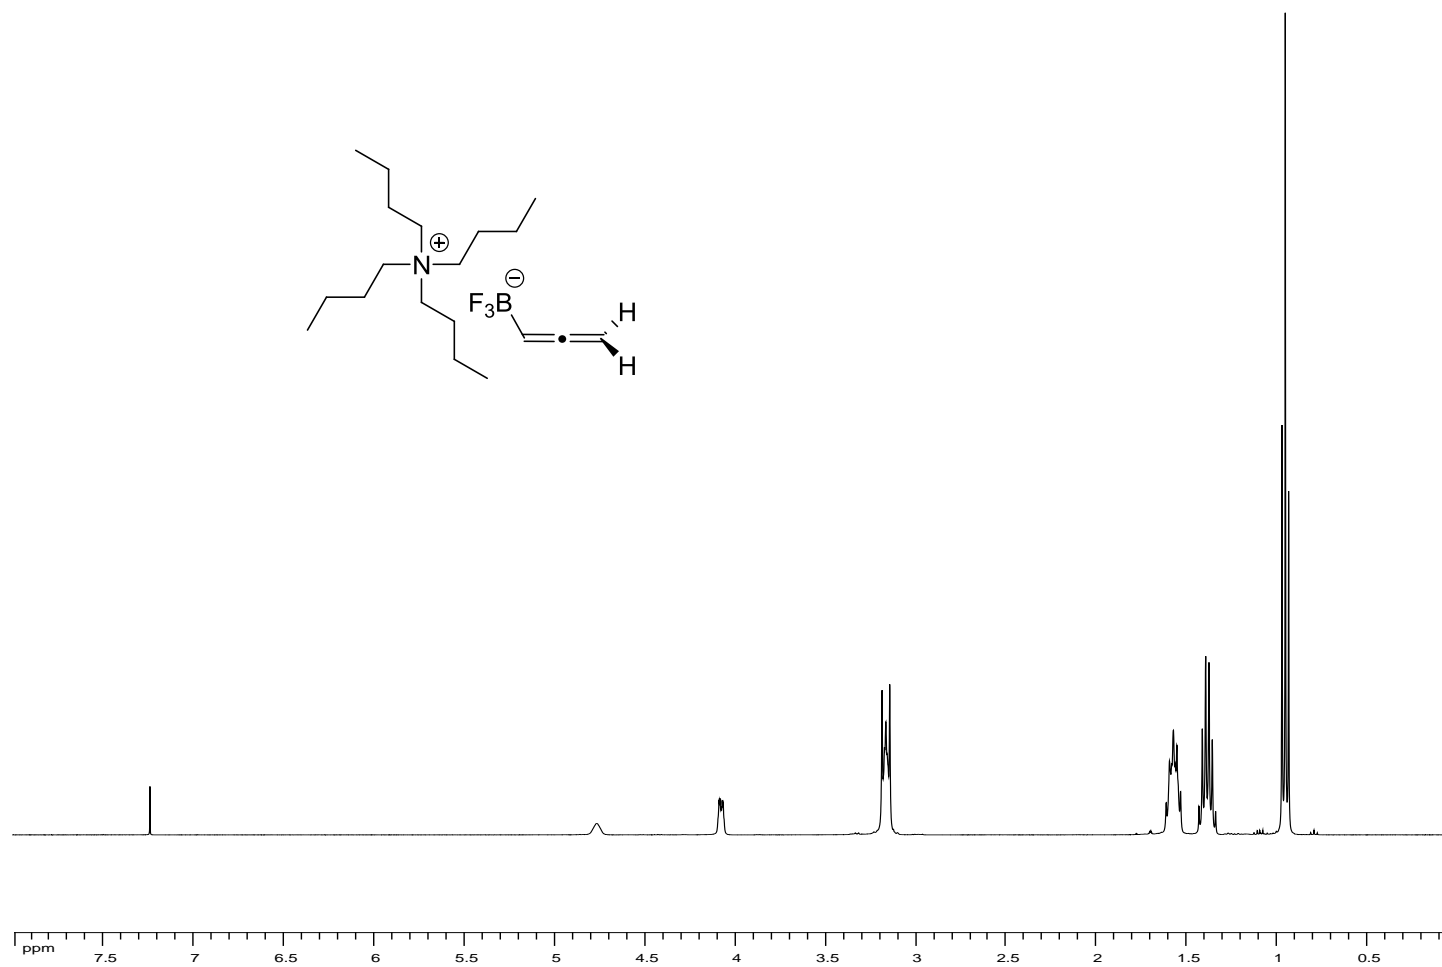

$^{13}\text{C}$  NMR (100 MHz,  $\text{CDCl}_3$ ) of compound **8**

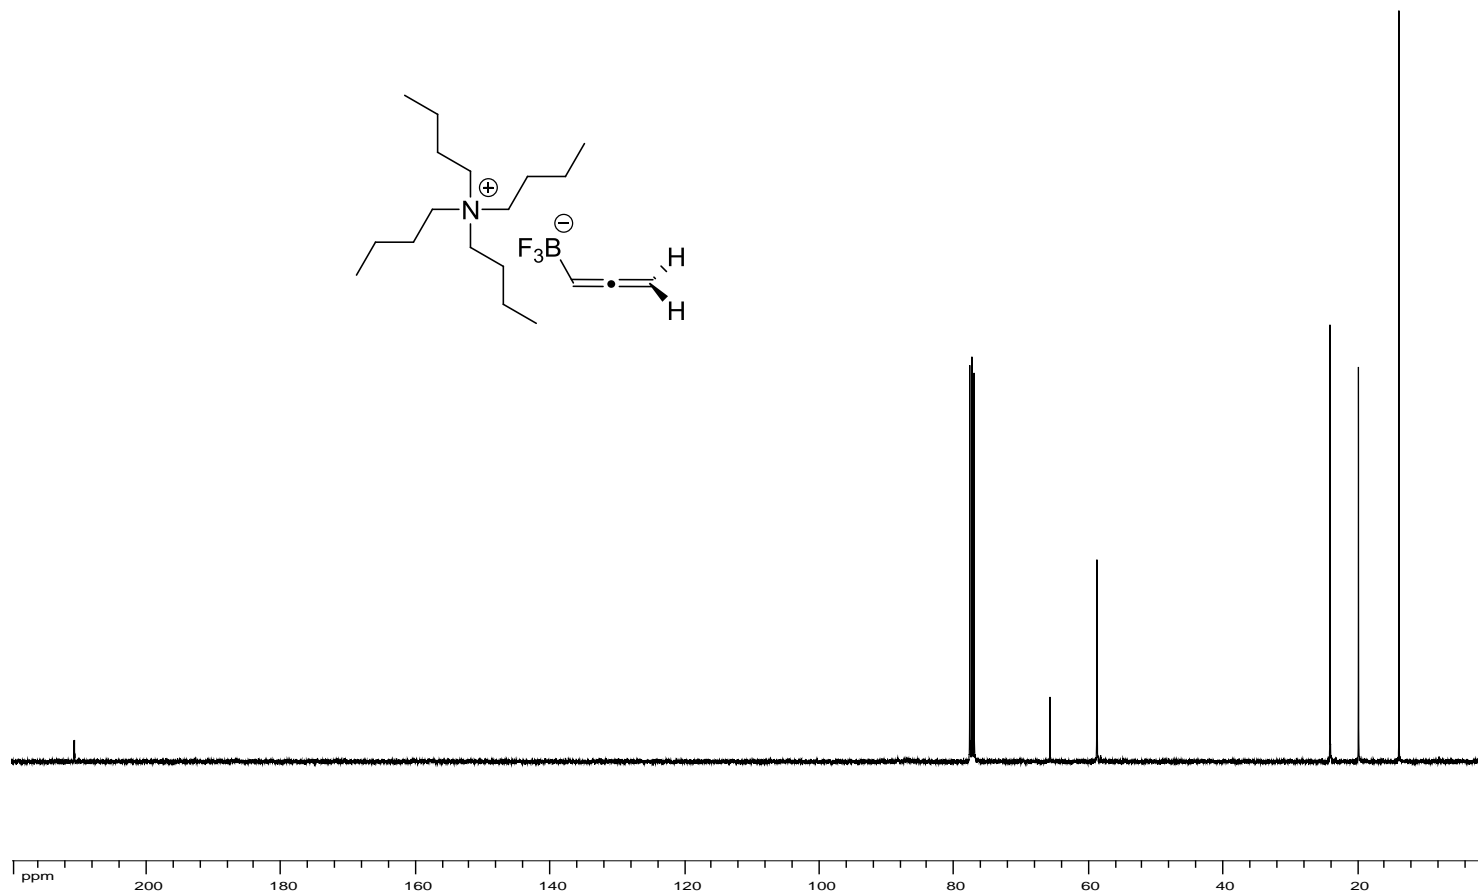

$^1\text{H}$  NMR (400 MHz,  $\text{CDCl}_3$ ) of compound **12**

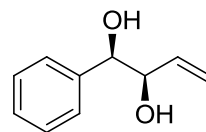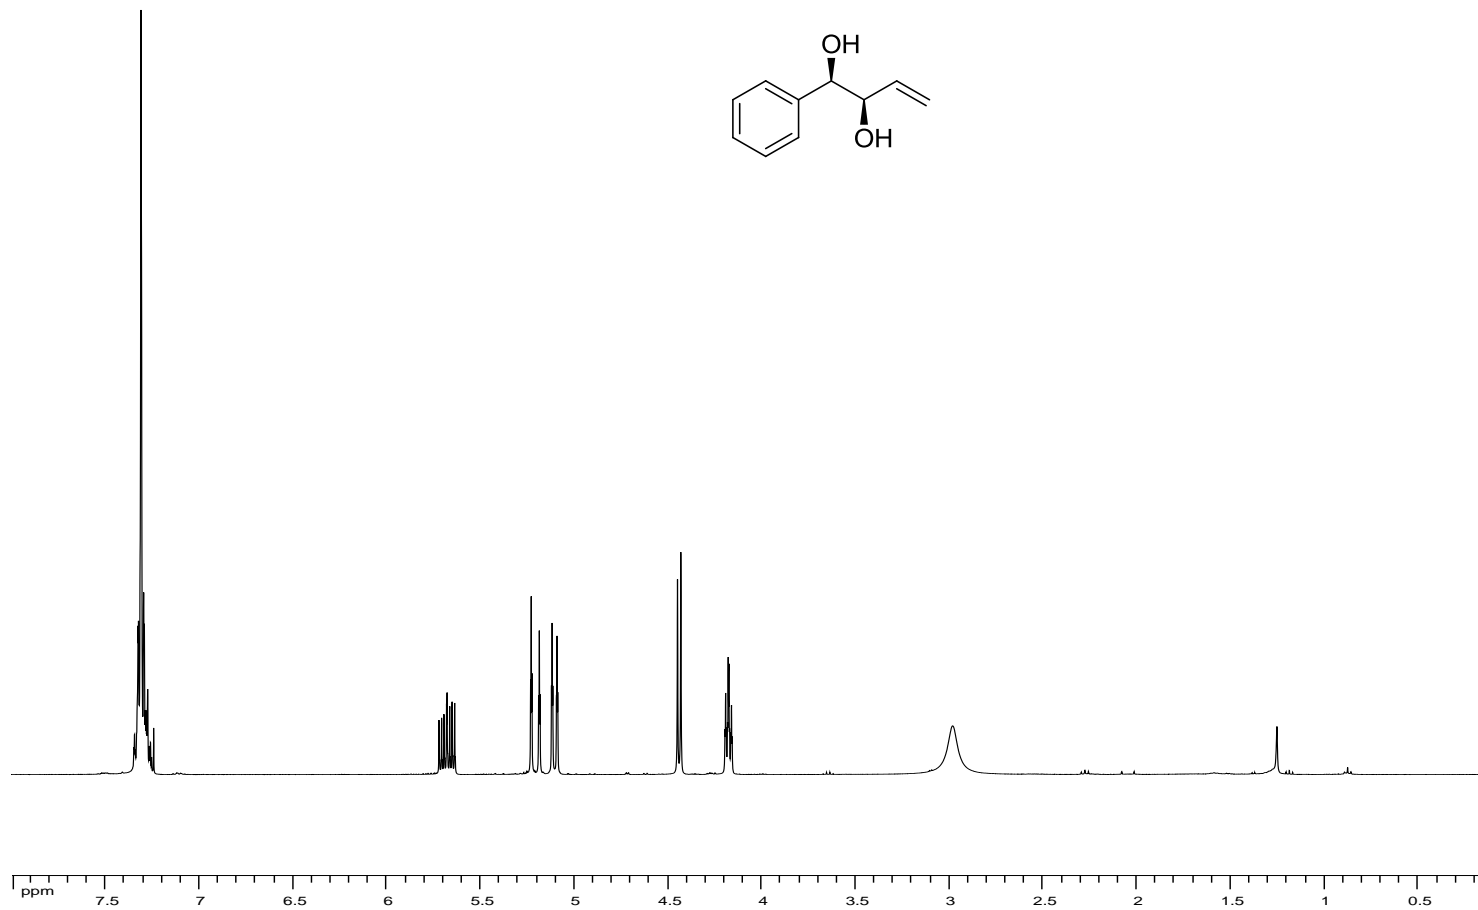

$^{13}\text{C}$  NMR (100 MHz,  $\text{CDCl}_3$ ) of compound **12**

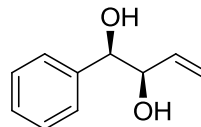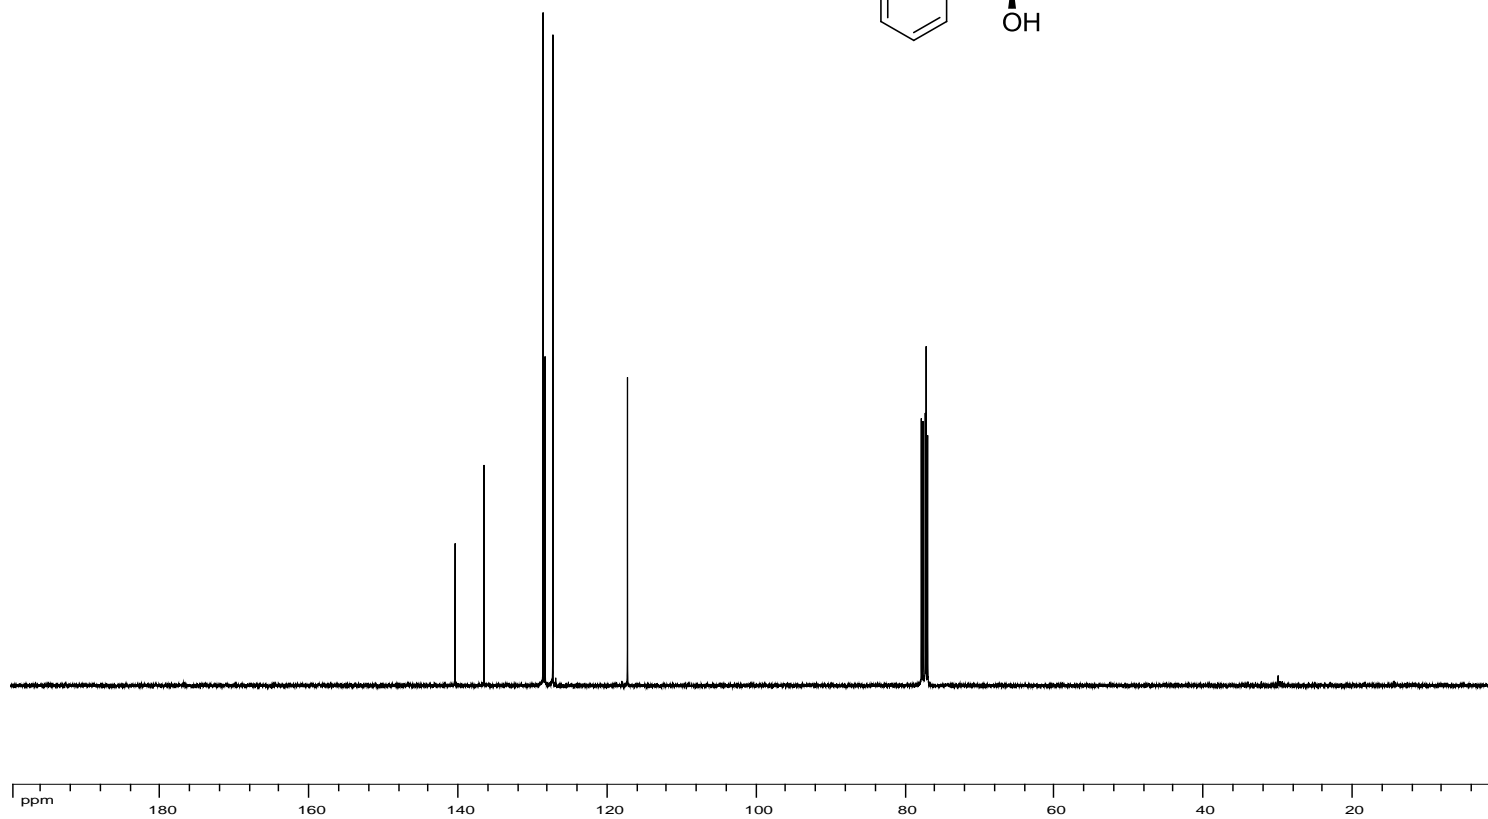

$^1\text{H}$  NMR (400 MHz,  $\text{CDCl}_3$ ) of compound **SI-4**

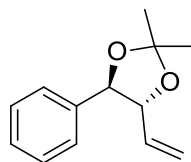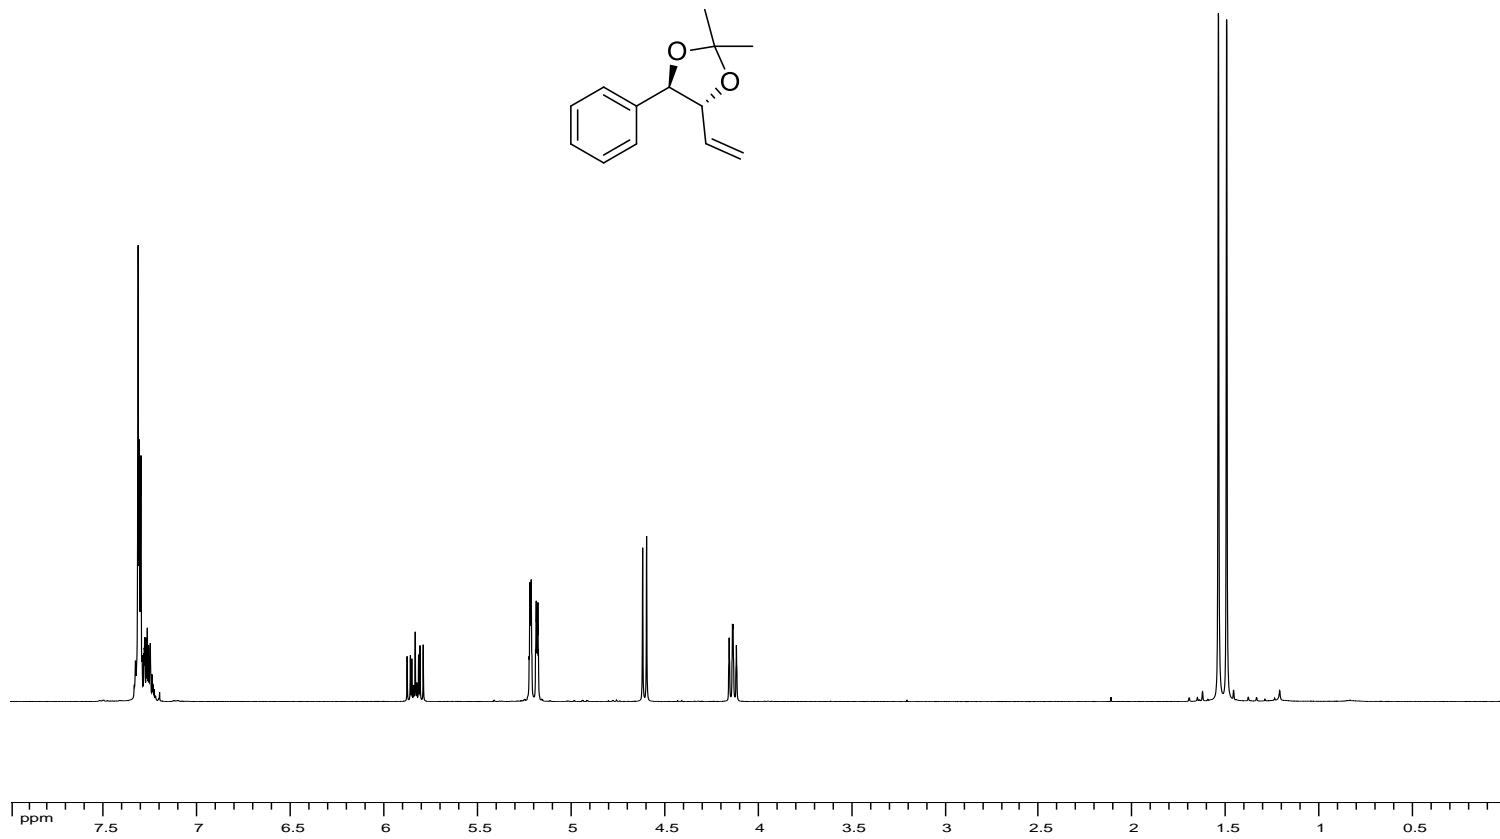

$^{13}\text{C}$  NMR (100 MHz,  $\text{CDCl}_3$ ) of compound **SI-4**

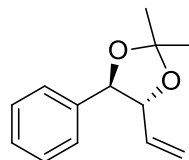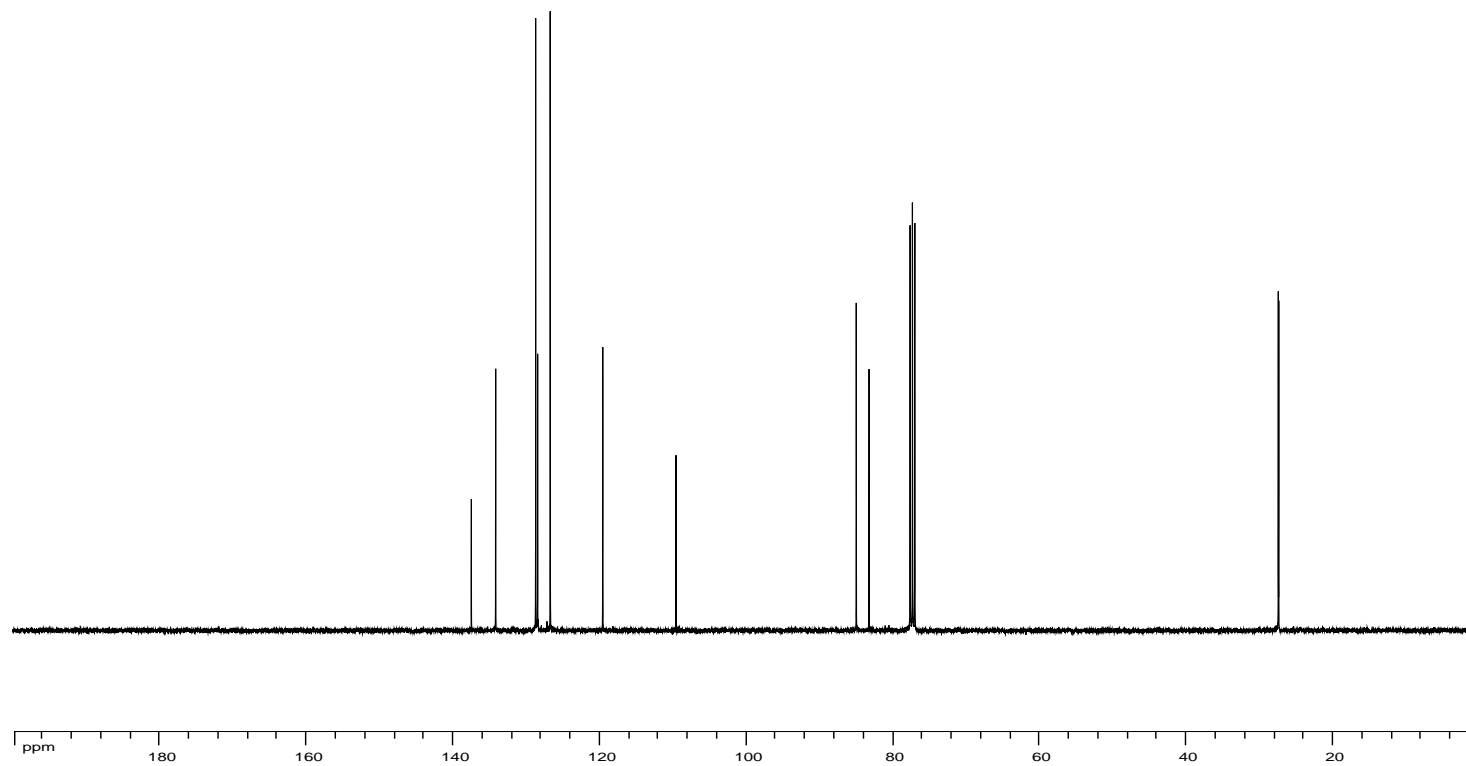

$^1\text{H}$  NMR (400 MHz,  $\text{CDCl}_3$ ) of compound **13**

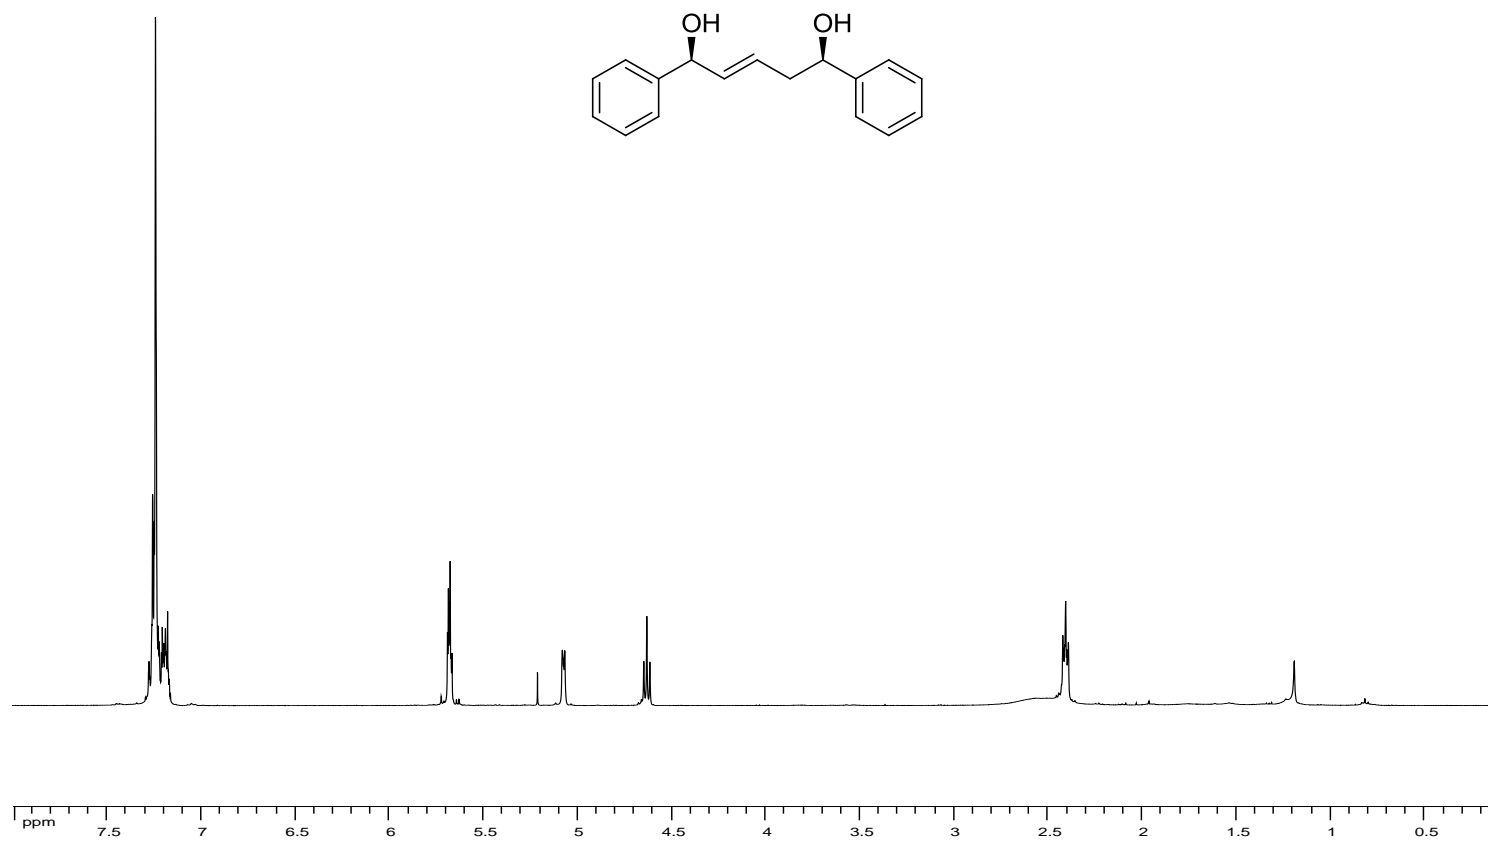



$^{13}\text{C}$  NMR (100 MHz,  $\text{CDCl}_3$ ) of compound **13**

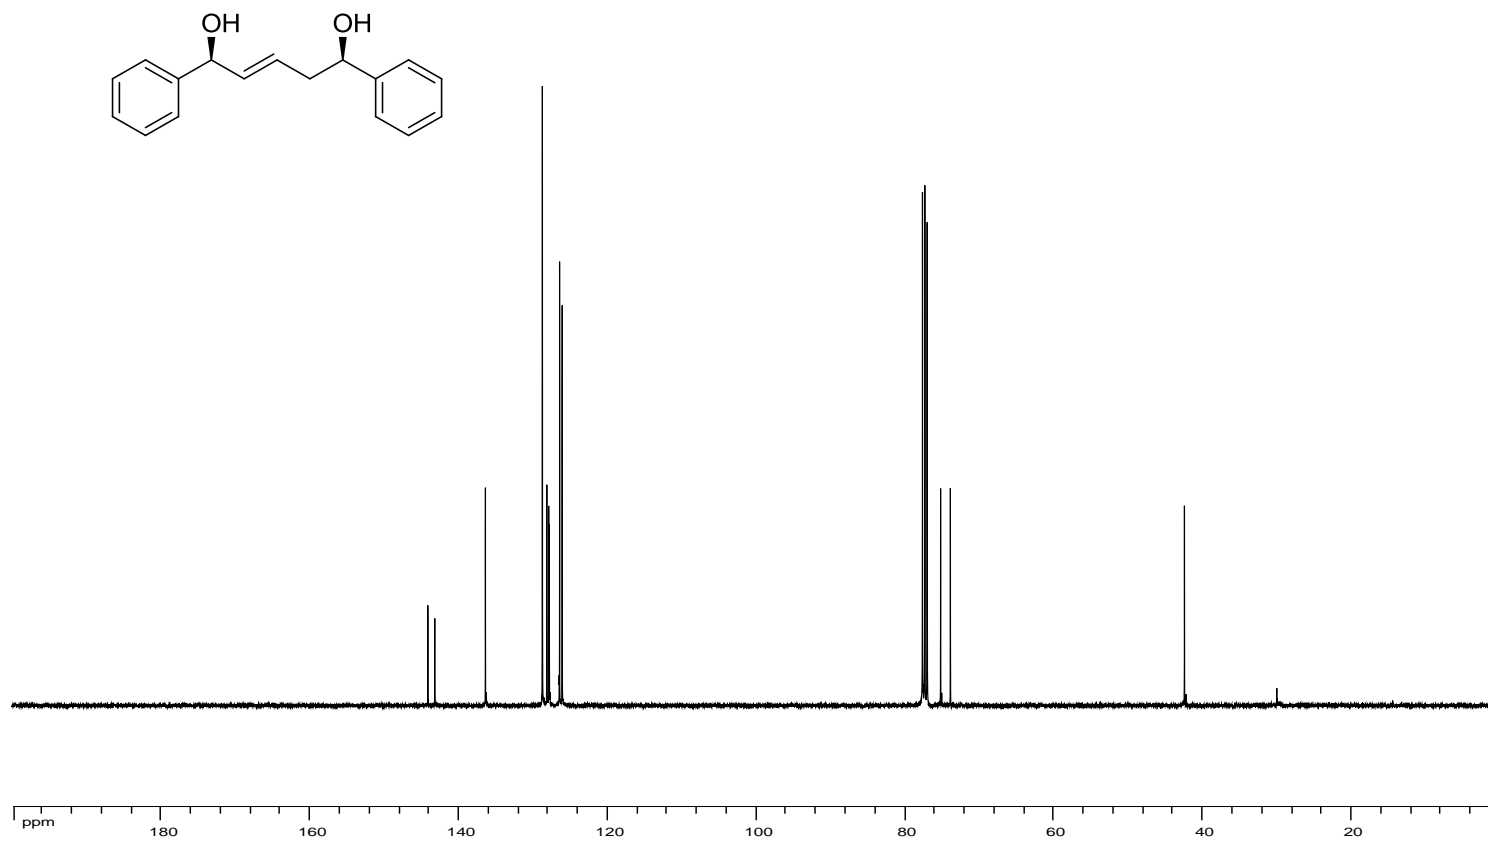

$^1\text{H}$  NMR (400 MHz,  $\text{CDCl}_3$ ) of compound **SI-7**

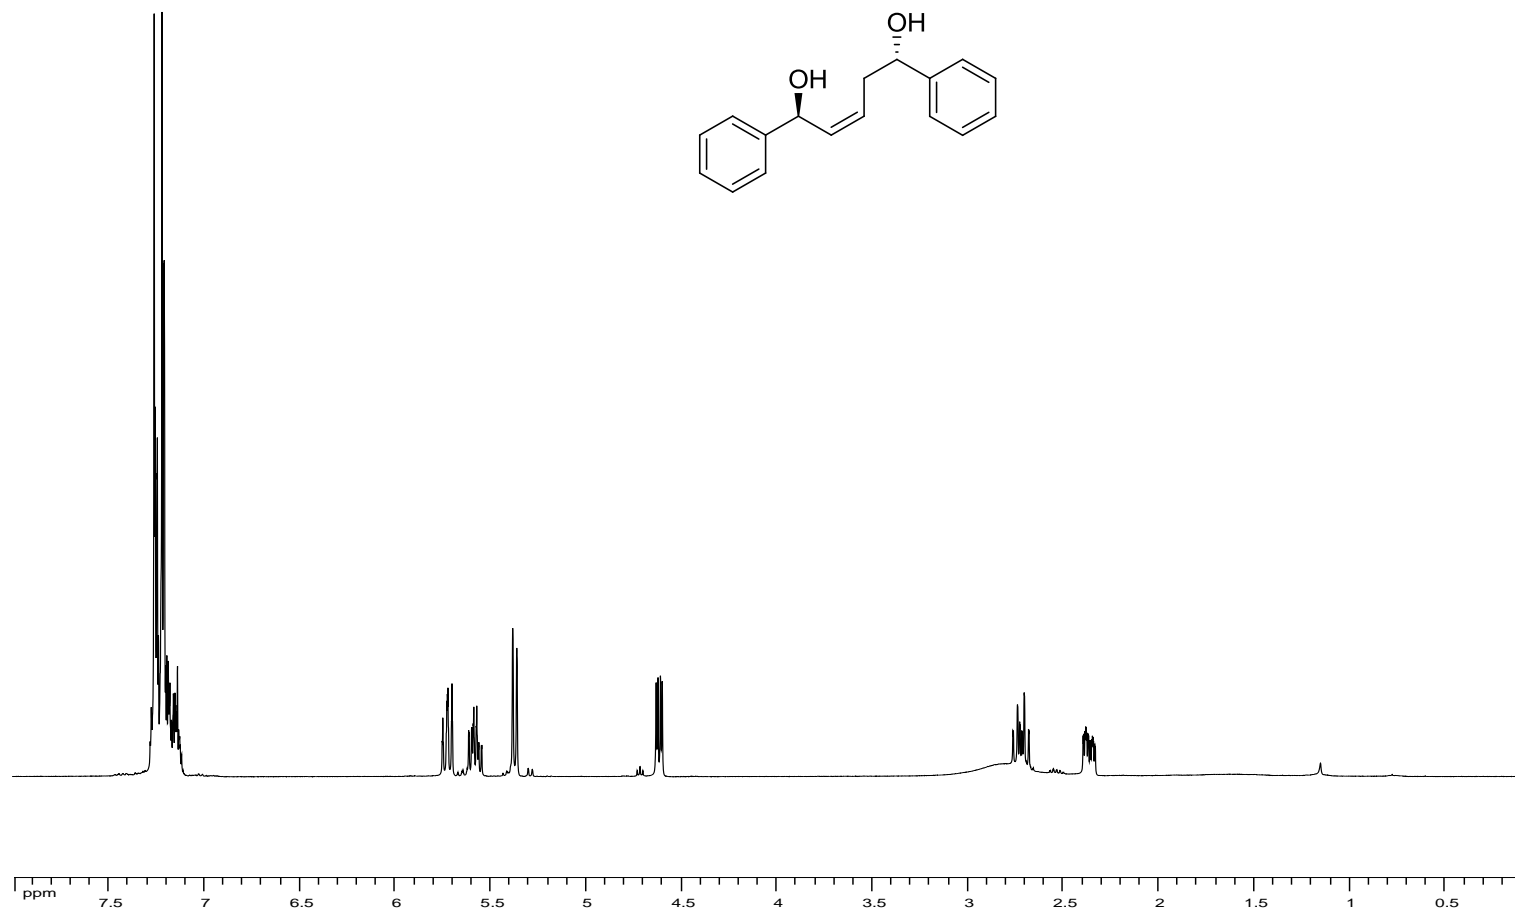

$^{13}\text{C}$  NMR (100 MHz,  $\text{CDCl}_3$ ) of compound **SI-7**

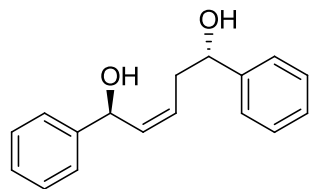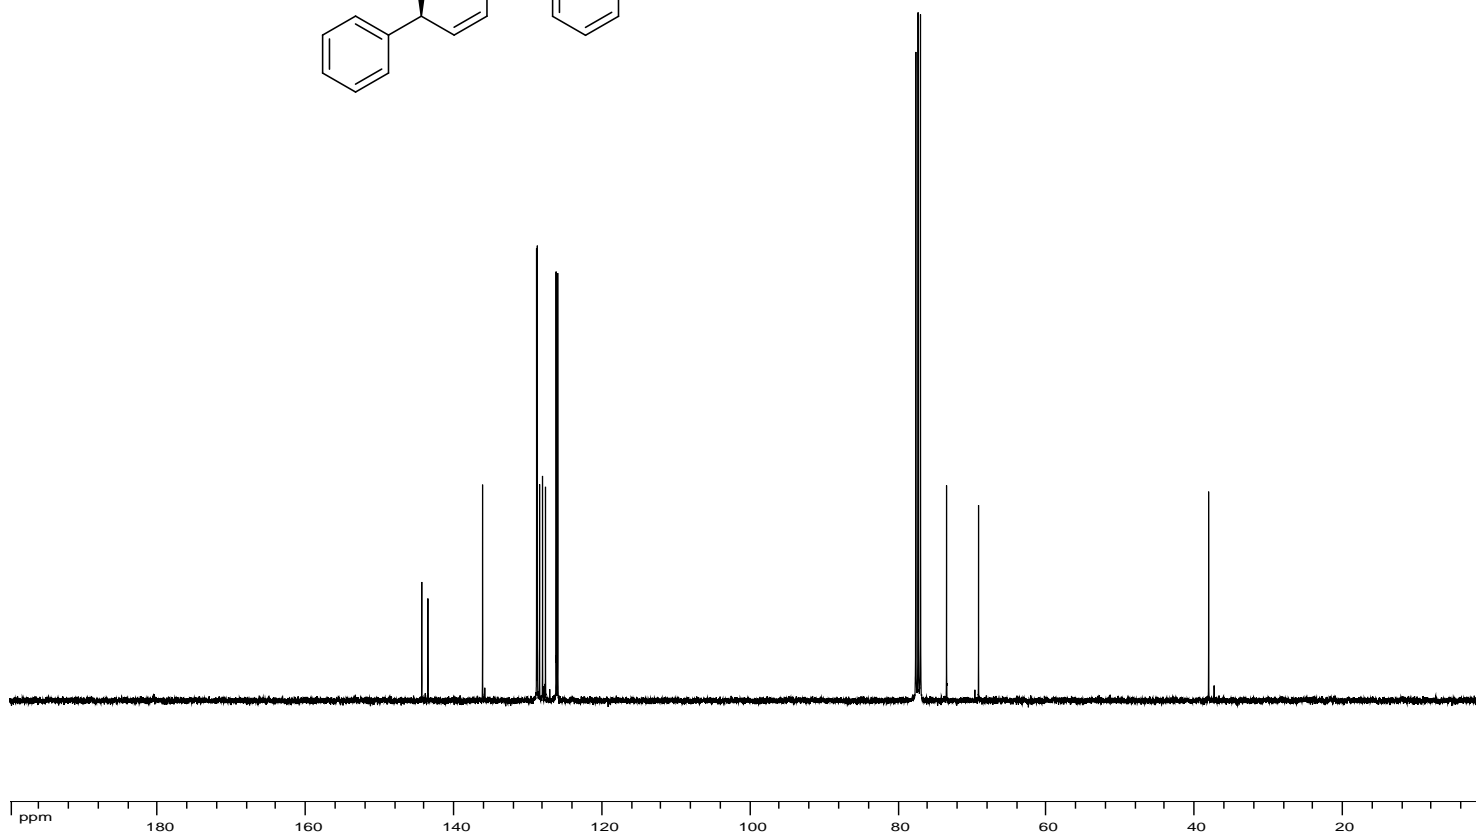

$^1\text{H}$  NMR (400 MHz,  $\text{CDCl}_3$ ) of compound **14**

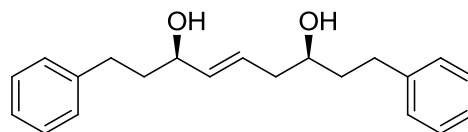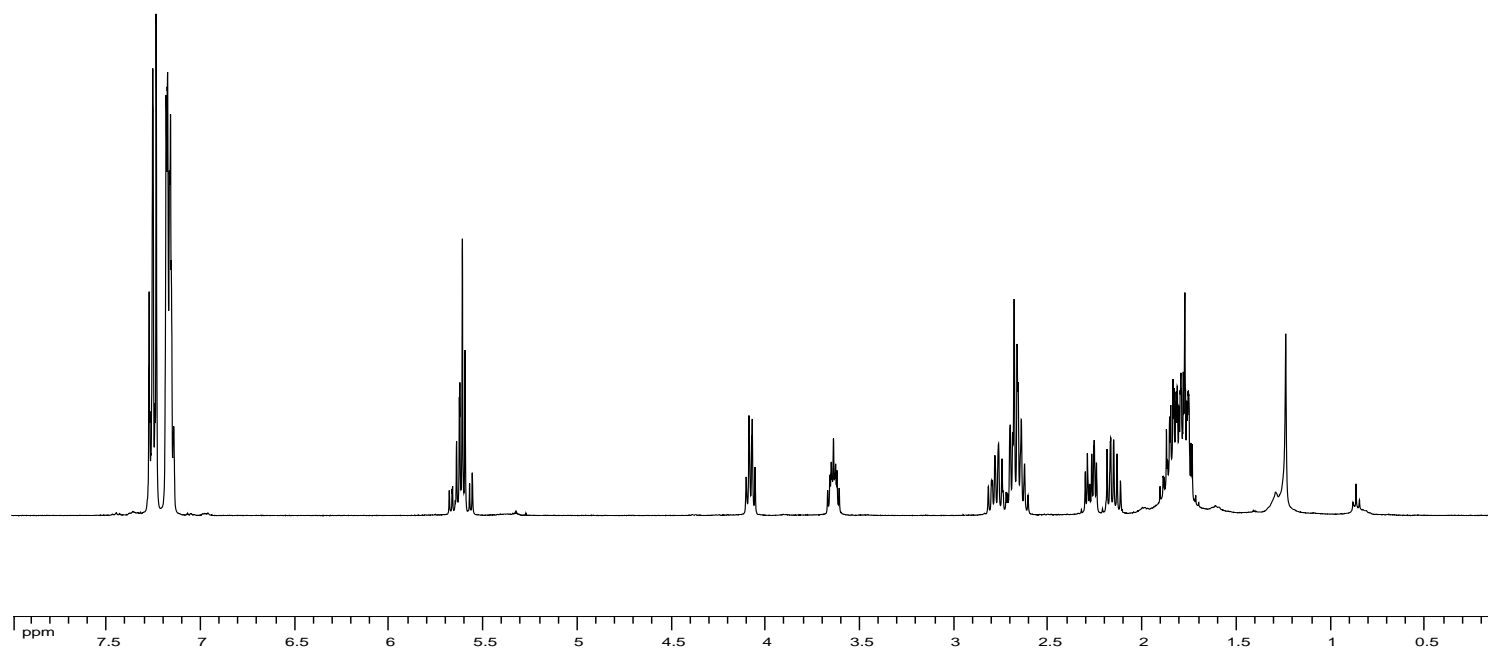

$^{13}\text{C}$  NMR (100 MHz,  $\text{CDCl}_3$ ) of compound **14**

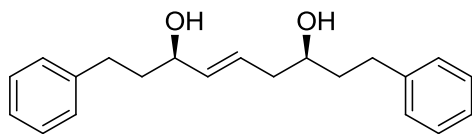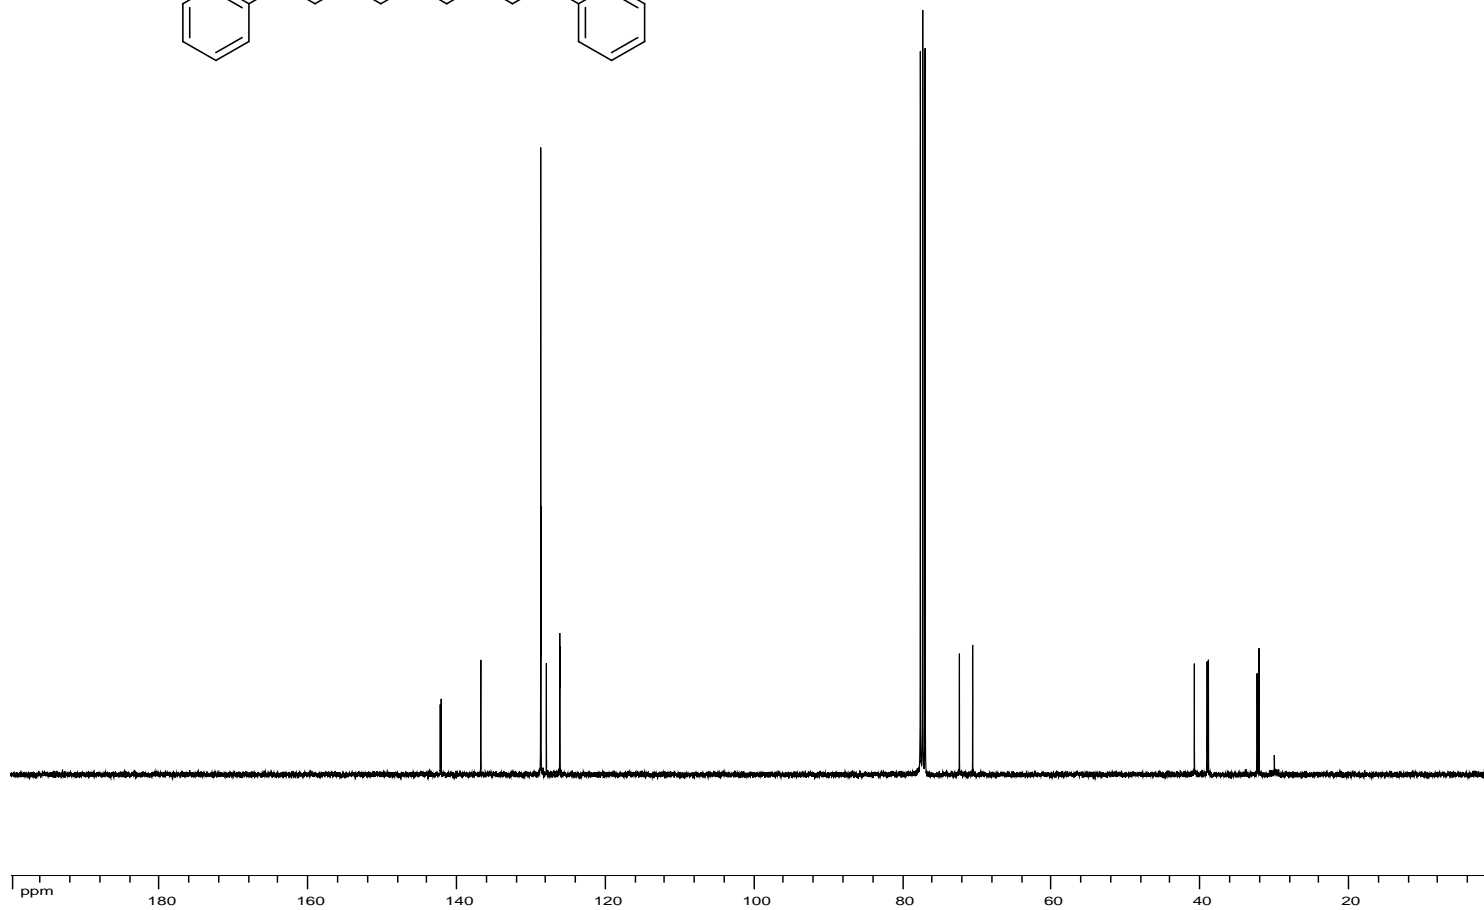

$^1\text{H}$  NMR (400 MHz,  $\text{CDCl}_3$ ) of compound **6a**

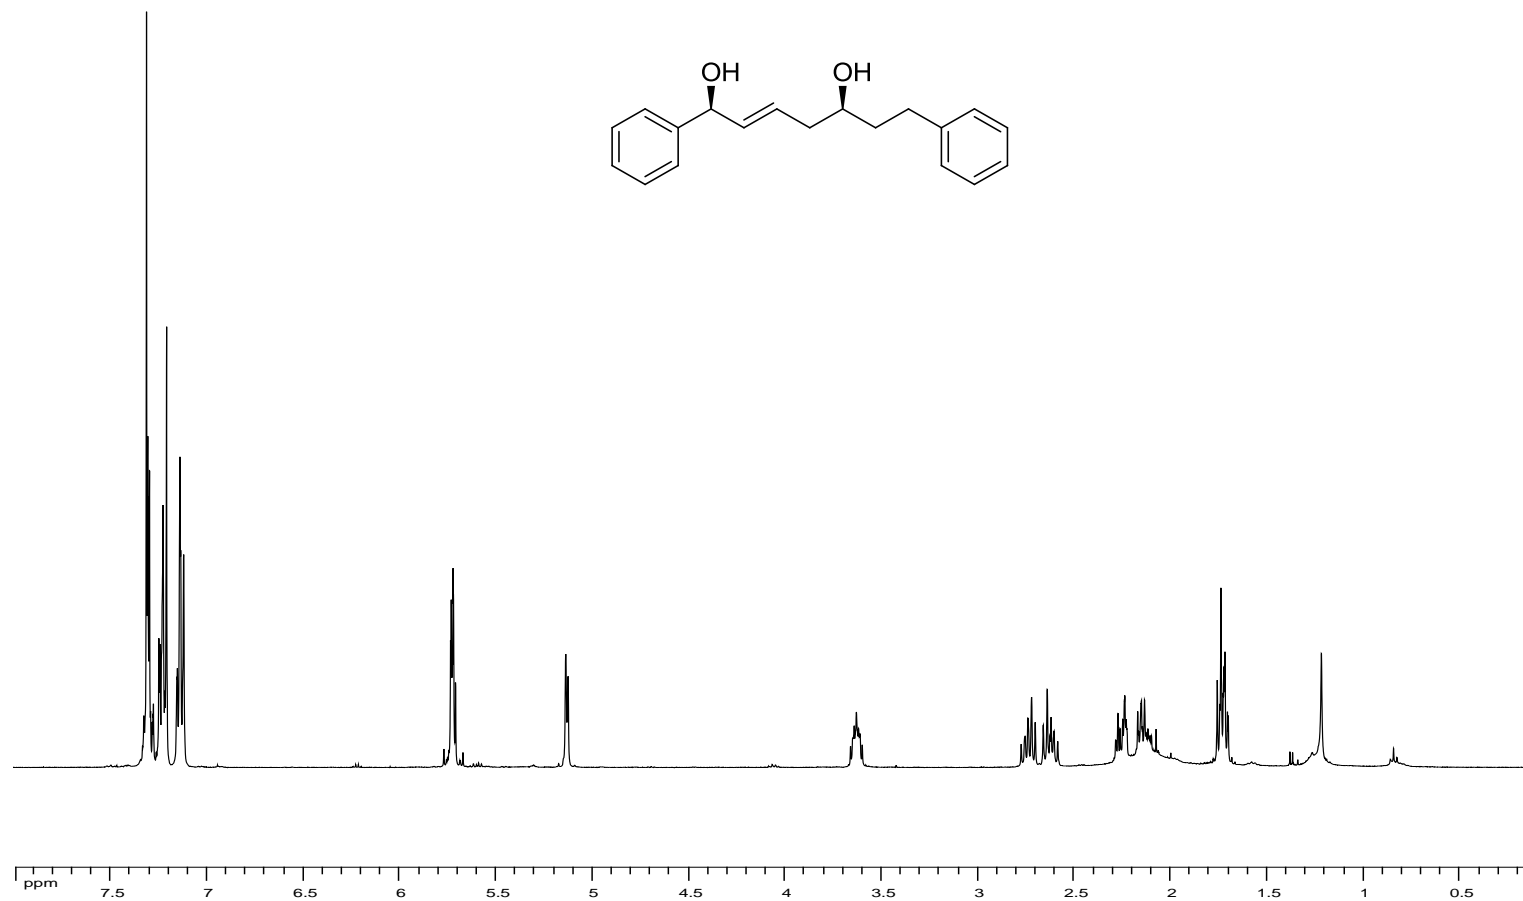

$^{13}\text{C}$  NMR (100 MHz,  $\text{CDCl}_3$ ) of compound **6a**

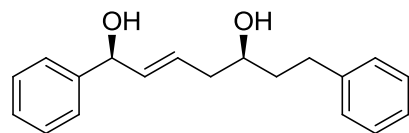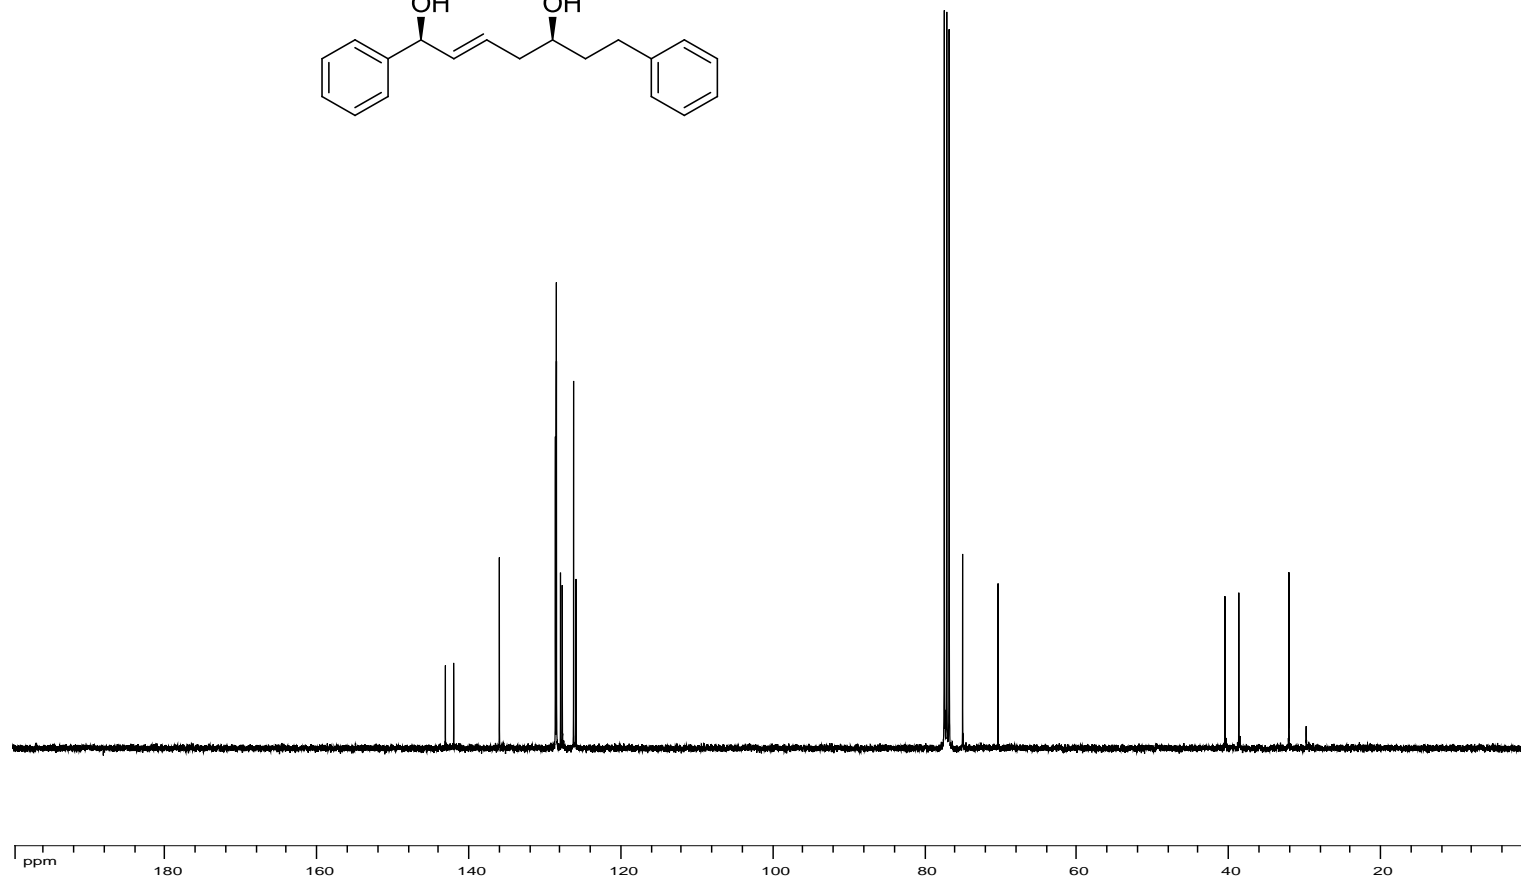

$^1\text{H}$  NMR (400 MHz,  $\text{CDCl}_3$ ) of compound **6b**

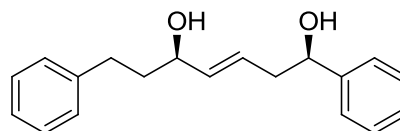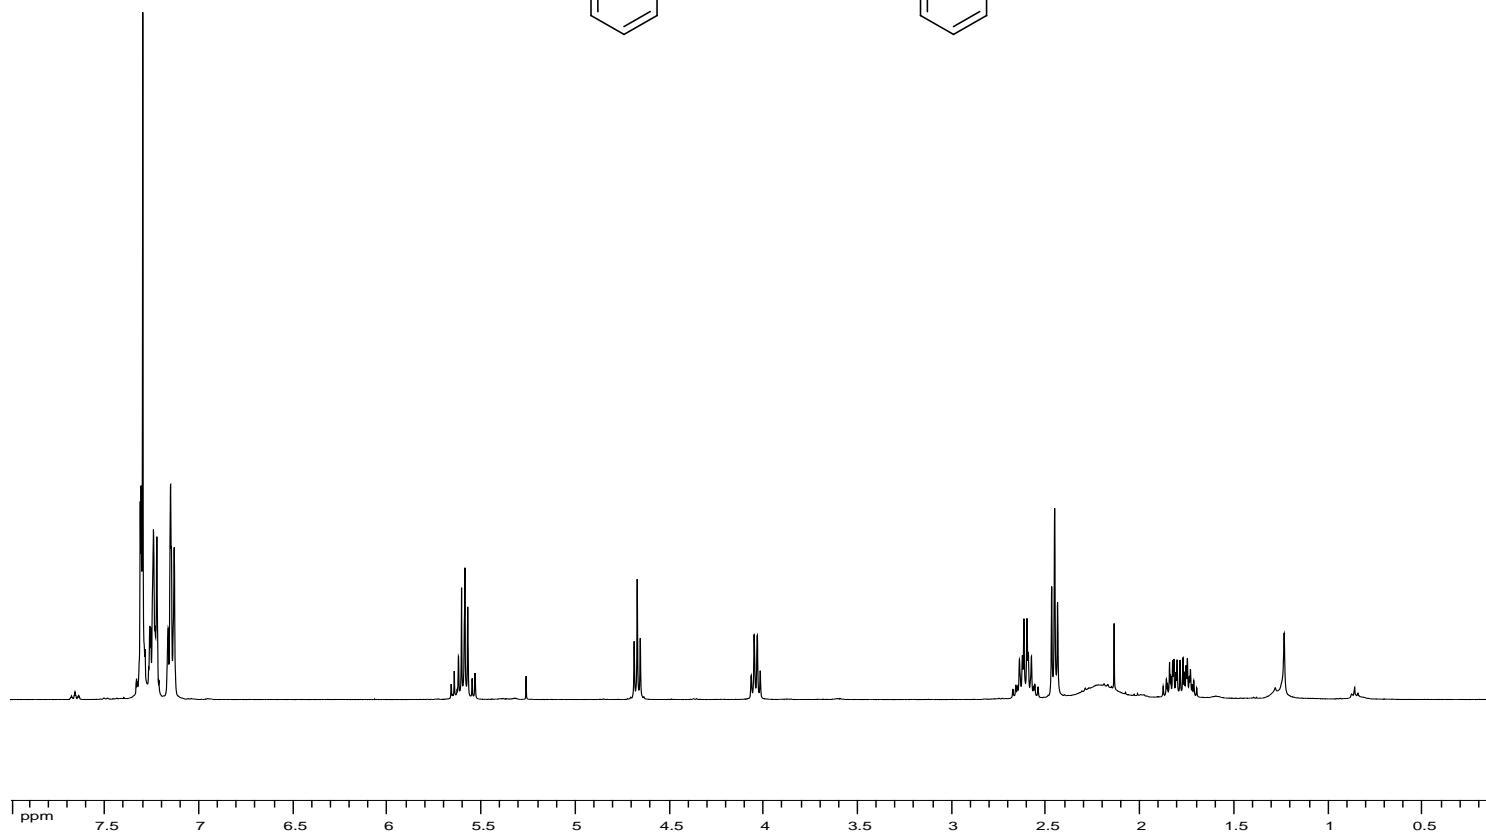



$^{13}\text{C}$  NMR (100 MHz,  $\text{CDCl}_3$ ) of compound **6b**

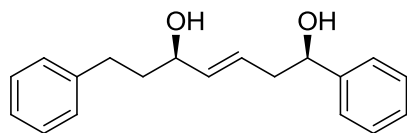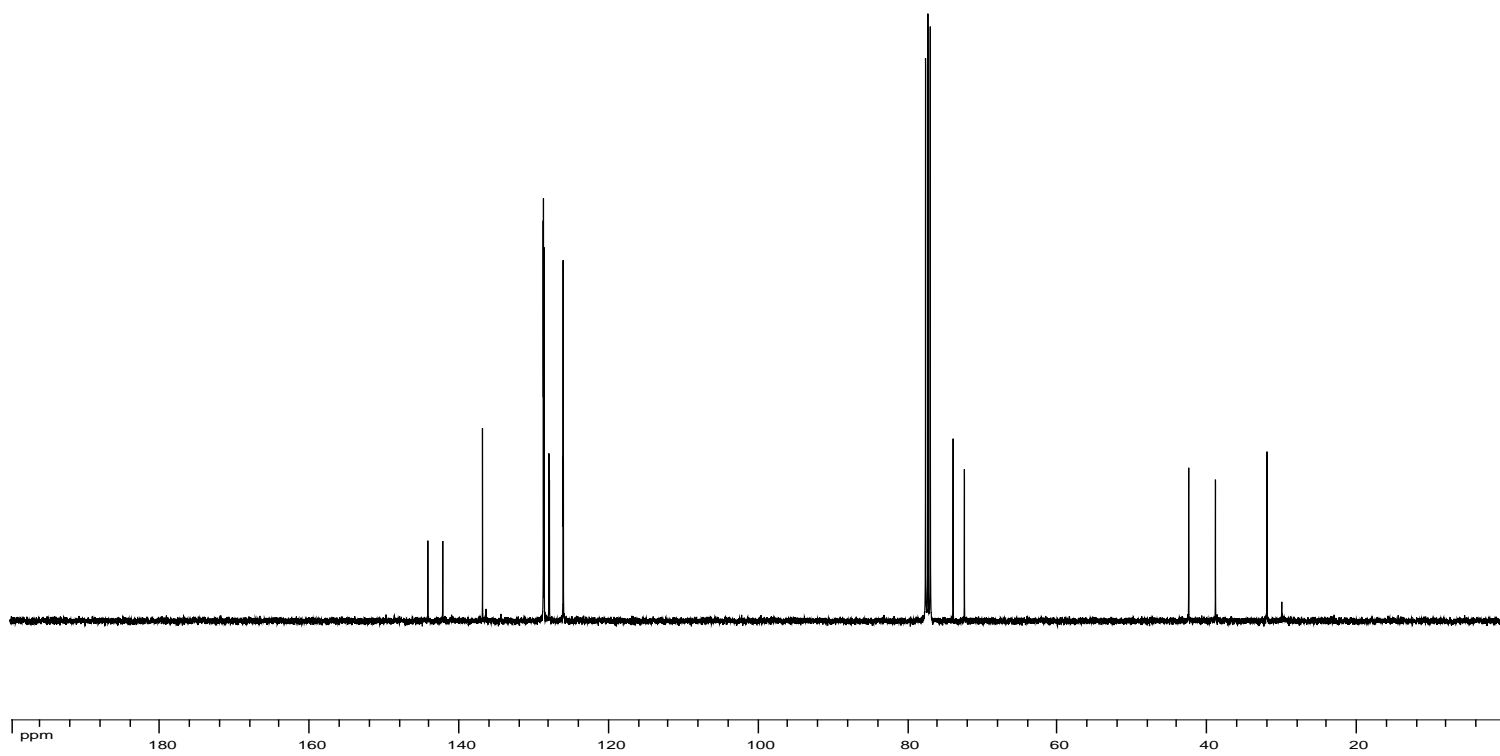

$^1\text{H}$  NMR (400 MHz,  $\text{CDCl}_3$ ) of compound **6c**

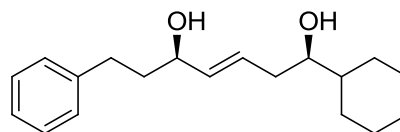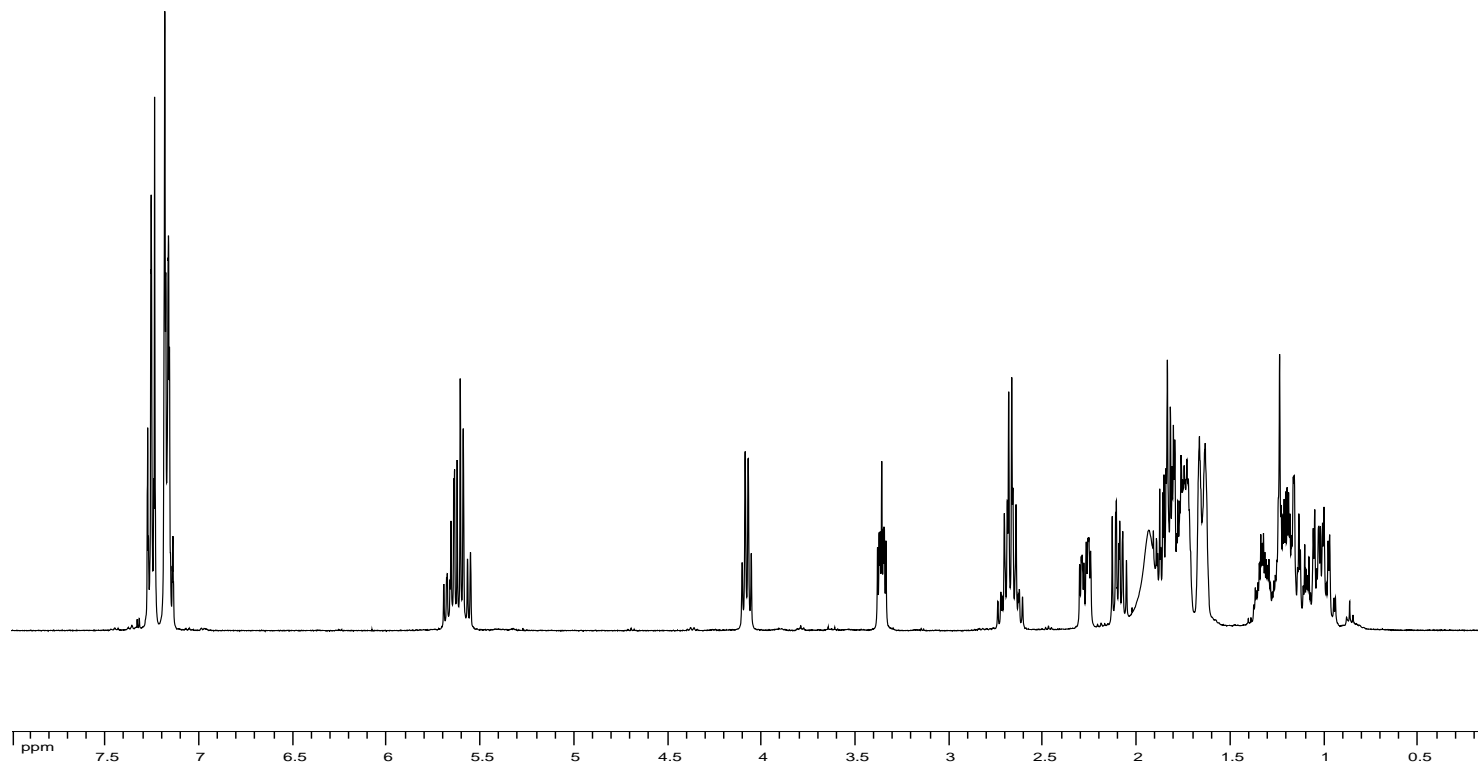

$^{13}\text{C}$  NMR (100 MHz,  $\text{CDCl}_3$ ) of compound **6c**

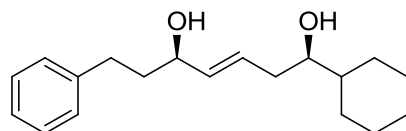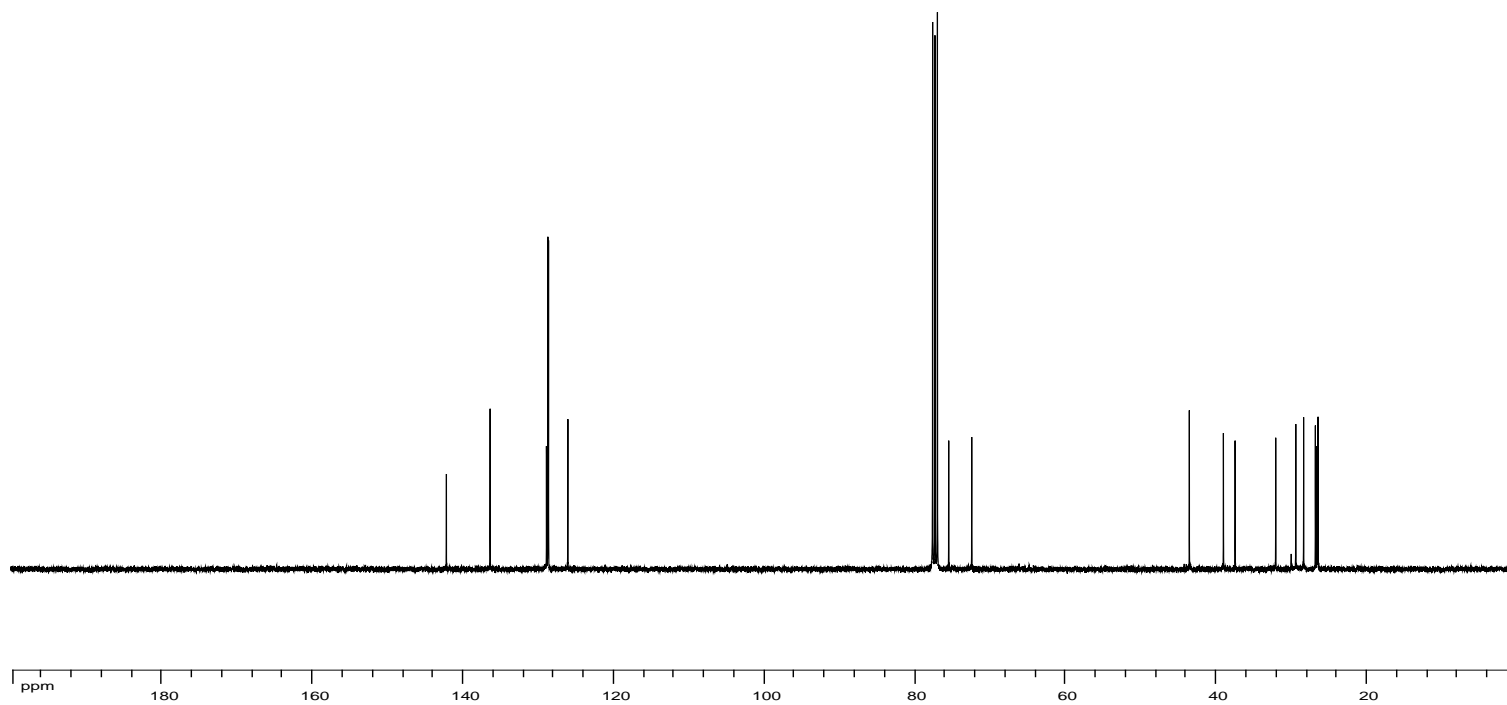

$^1\text{H}$  NMR (400 MHz,  $\text{CDCl}_3$ ) of compound **6d**

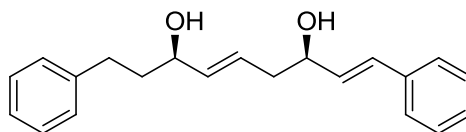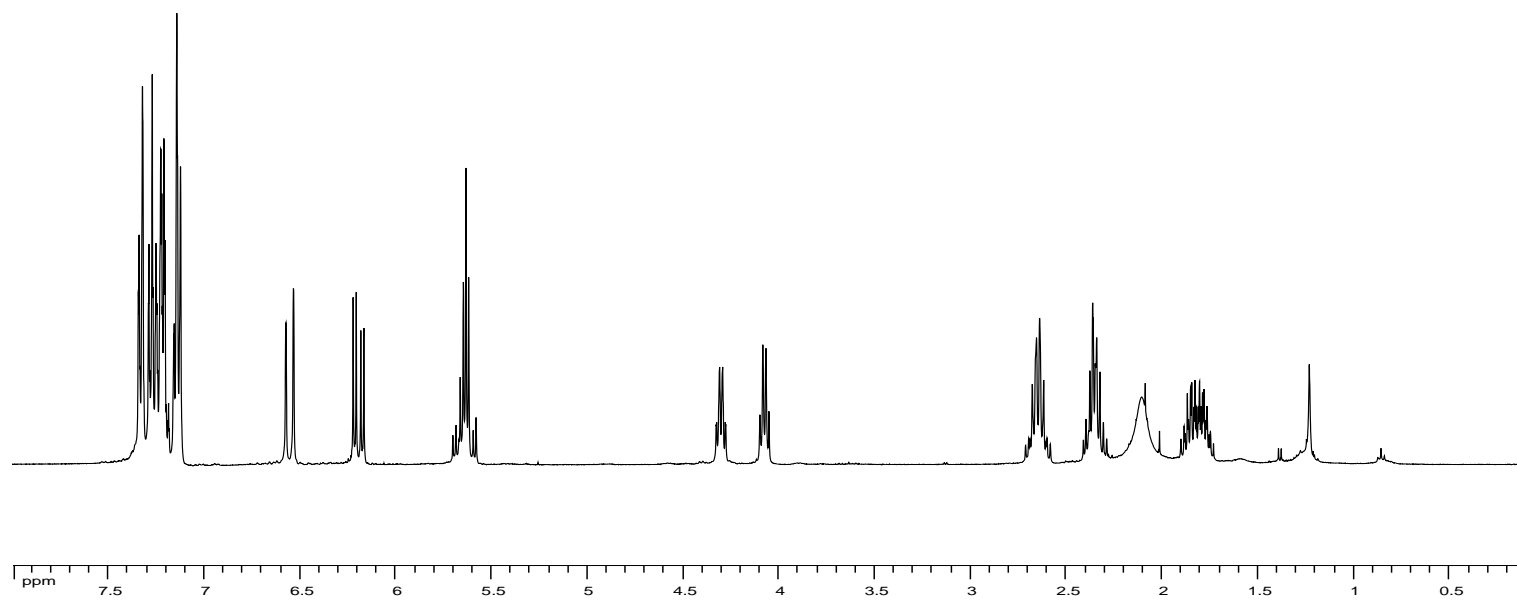

$^{13}\text{C}$  NMR (100 MHz,  $\text{CDCl}_3$ ) of compound **6d**

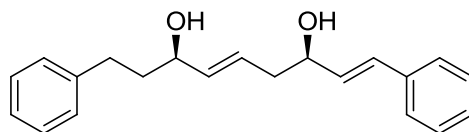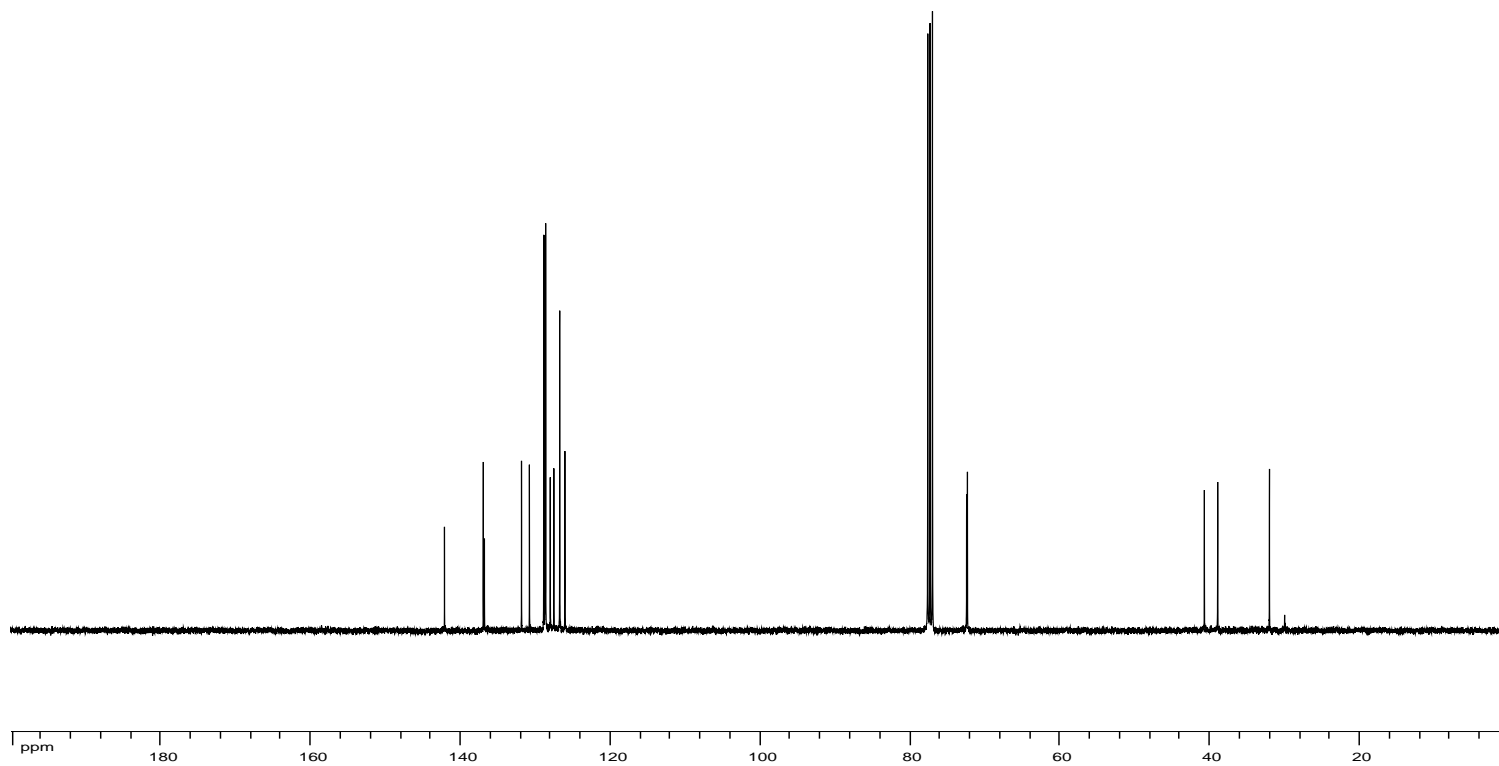

$^1\text{H}$  NMR (400 MHz,  $\text{CDCl}_3$ ) of compound **6e**

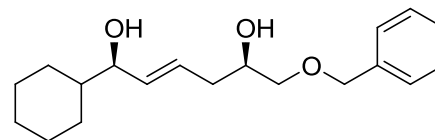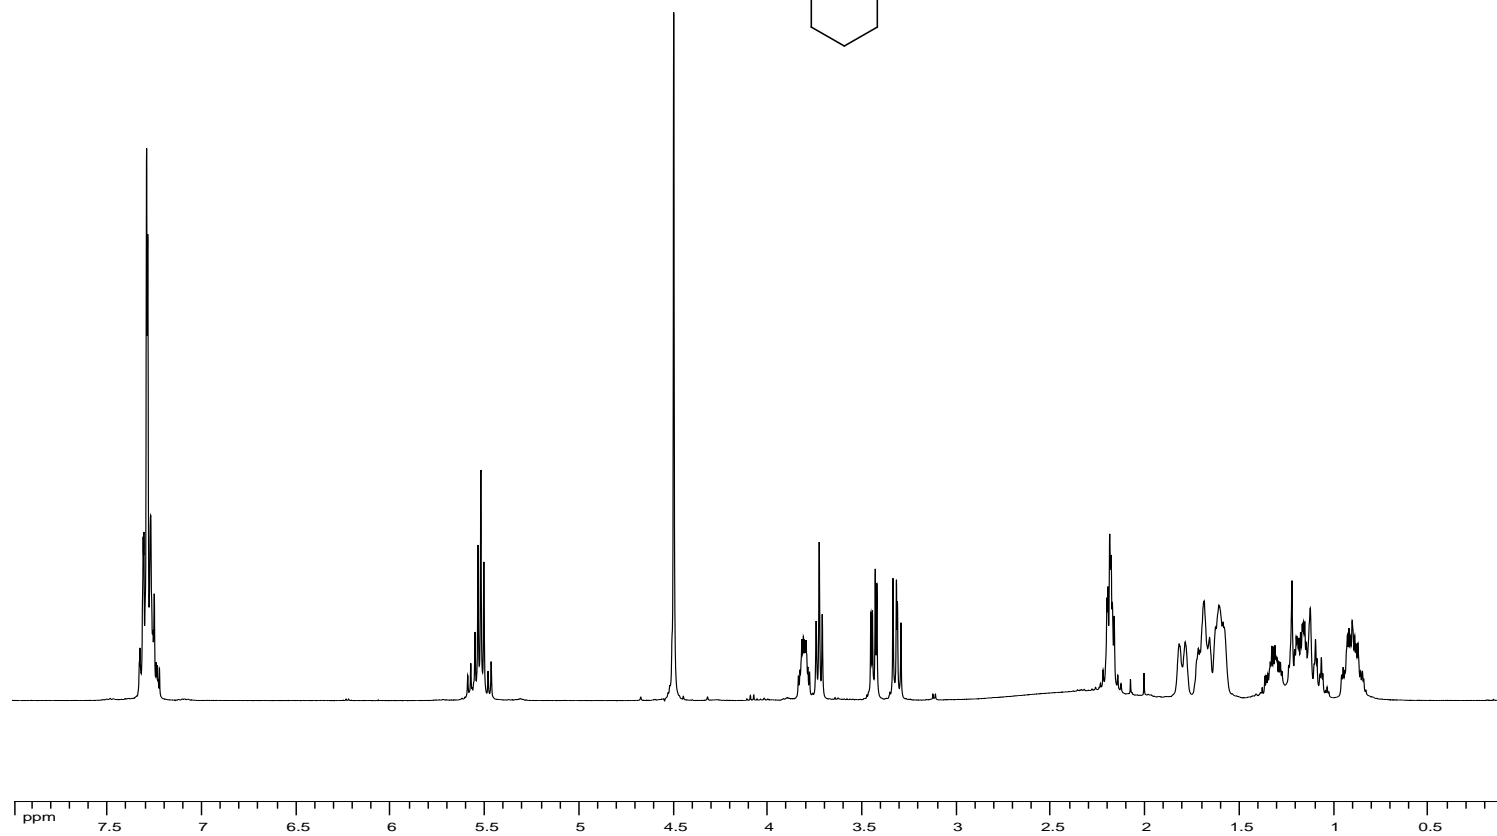

$^{13}\text{C}$  NMR (100 MHz,  $\text{CDCl}_3$ ) of compound **6e**

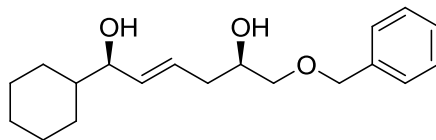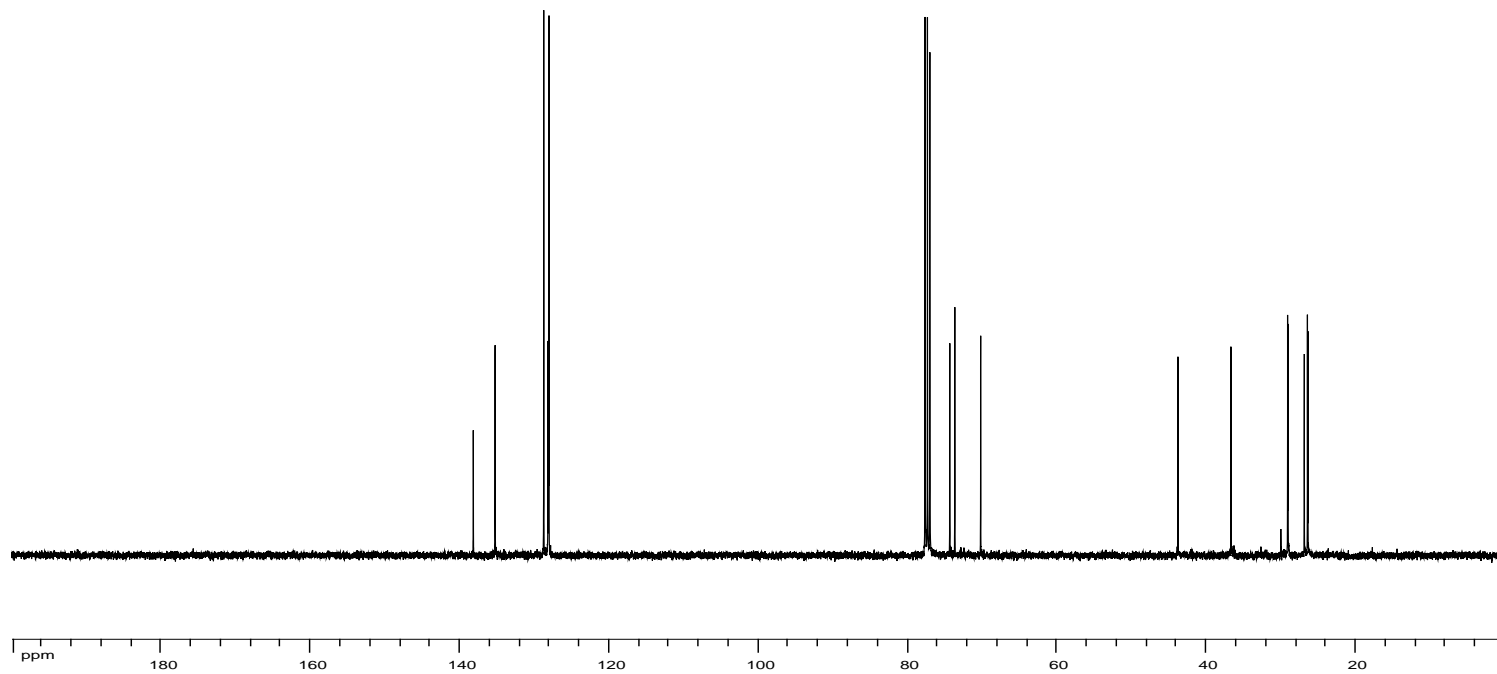

$^1\text{H}$  NMR (400 MHz,  $\text{CDCl}_3$ ) of compound **6f**

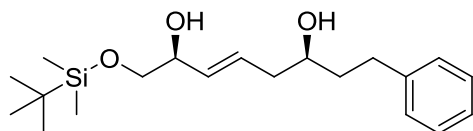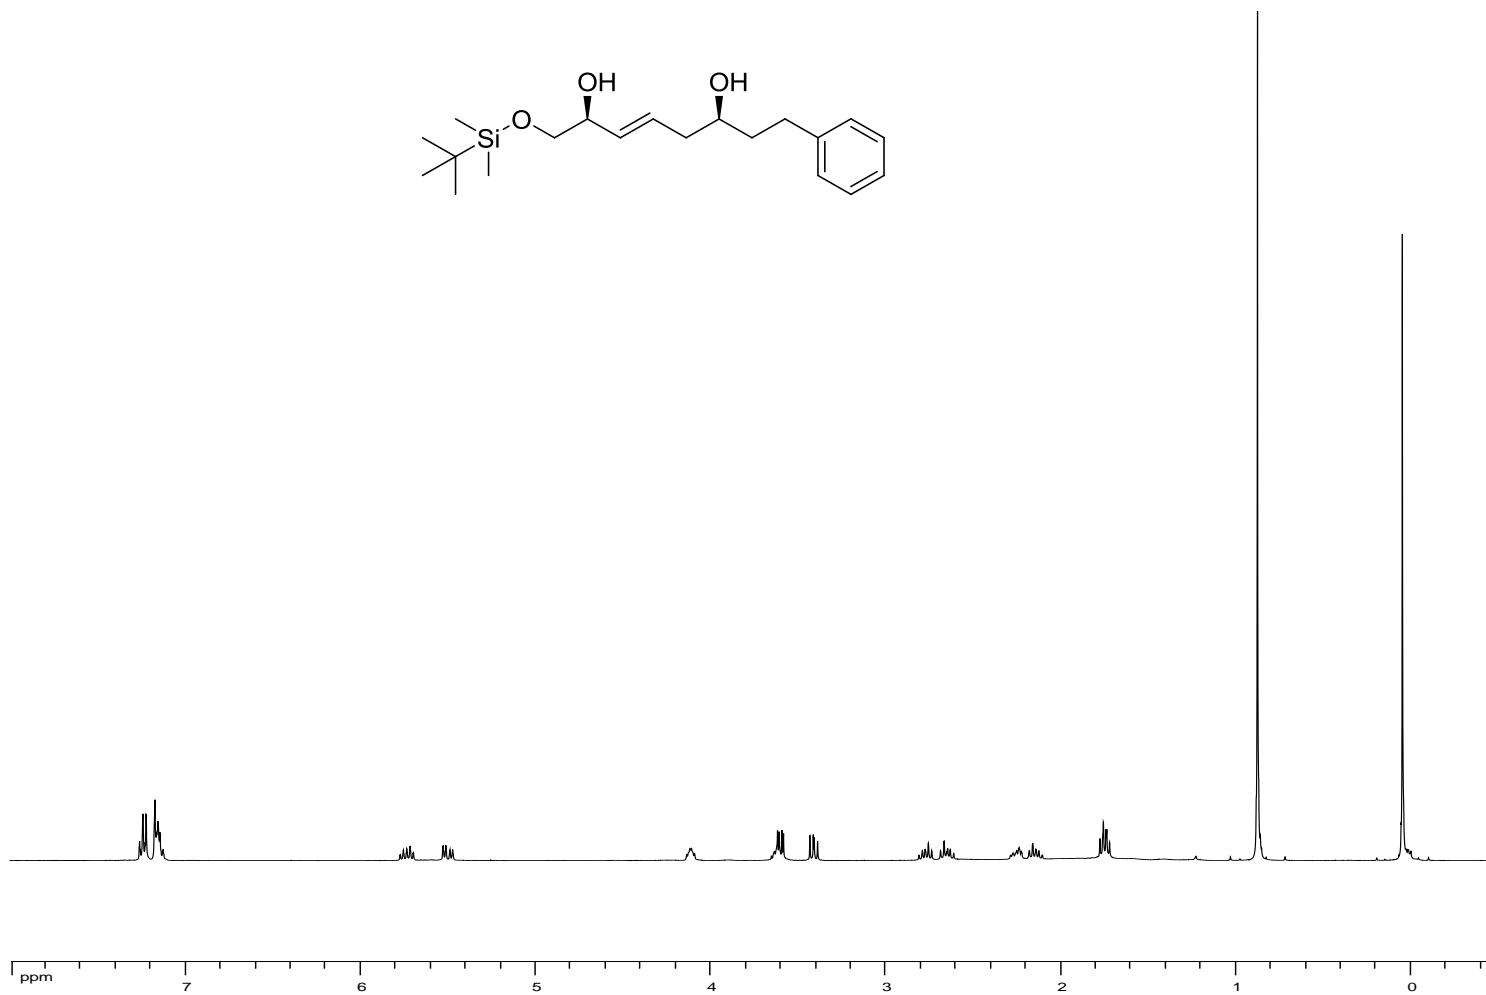



$^{13}\text{C}$  NMR (100 MHz,  $\text{CDCl}_3$ ) of compound **6f**

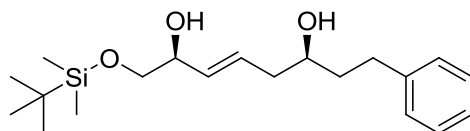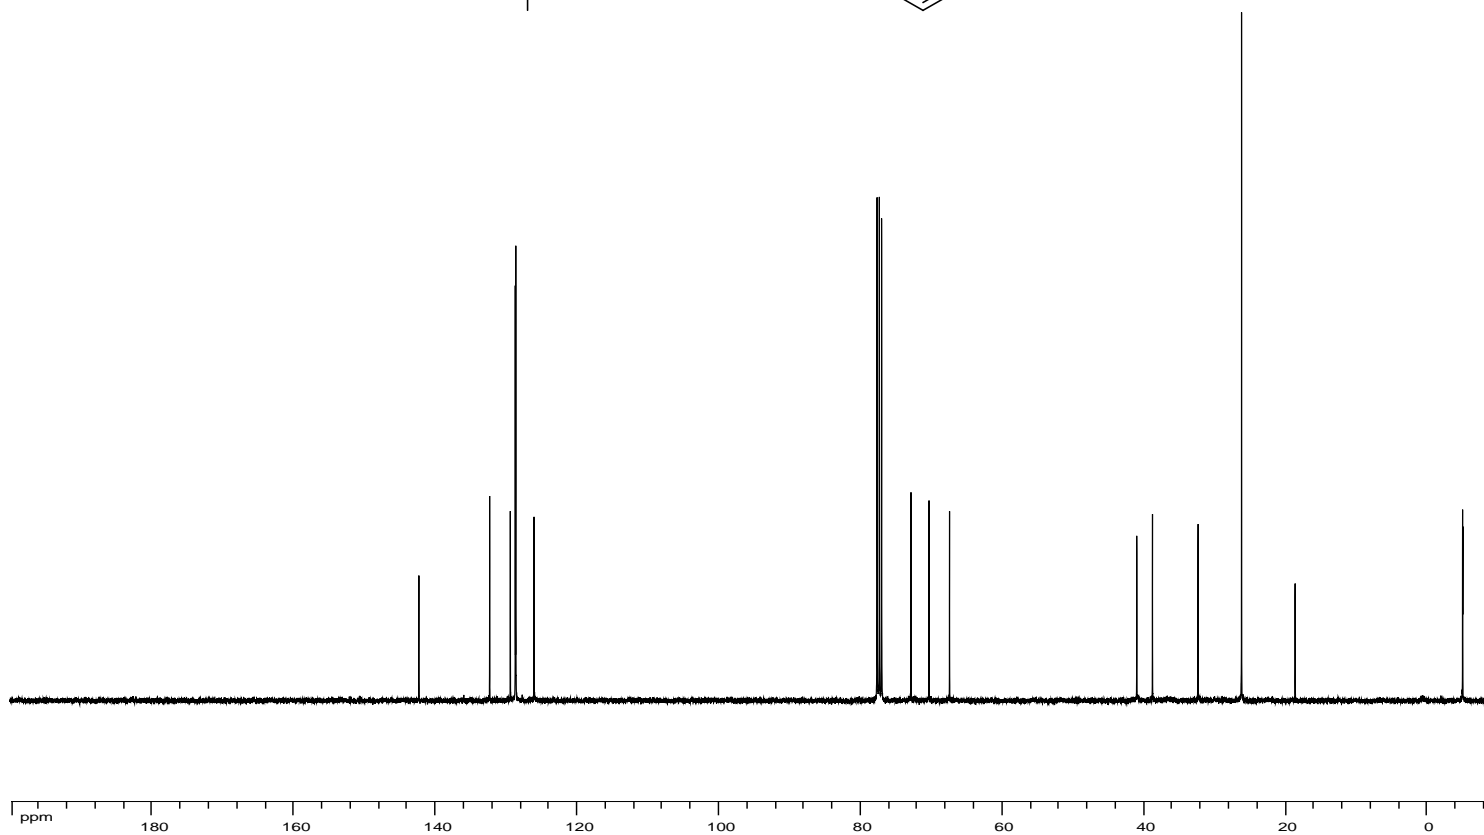

**$^1\text{H}$  spectrum of compound SI-9**

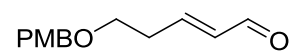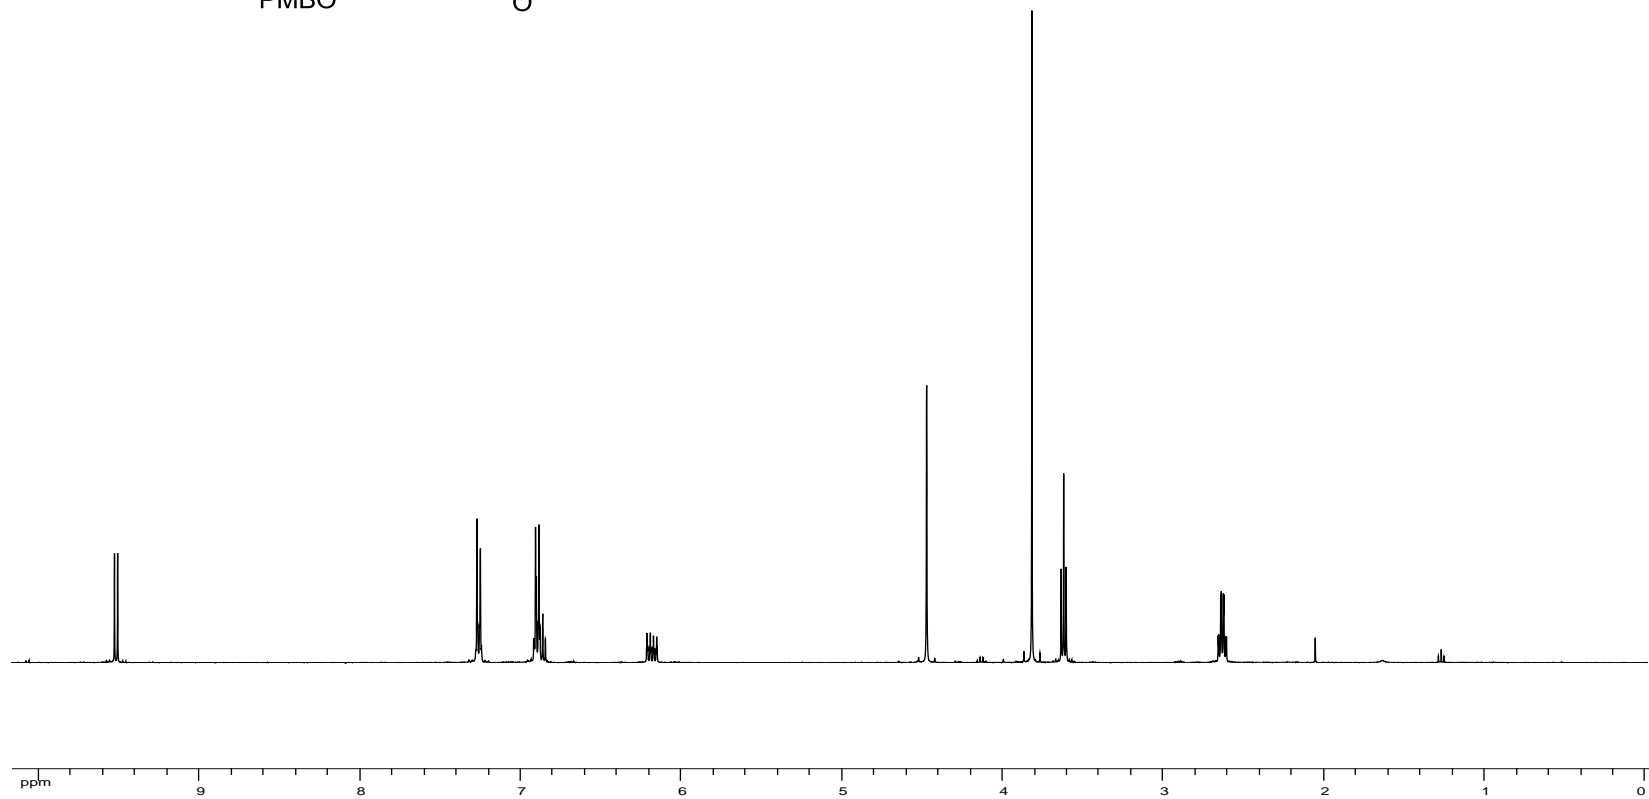

<sup>13</sup>C spectrum of compound SI-9

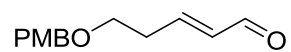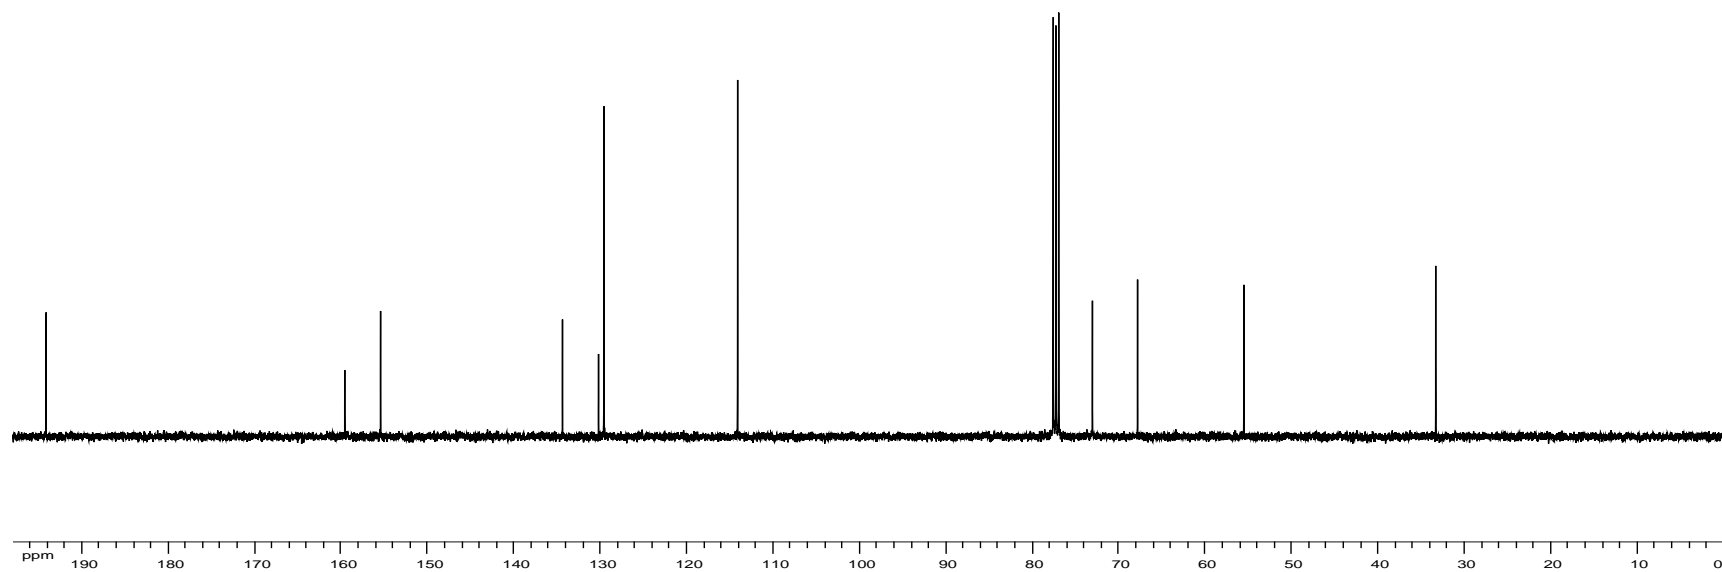

**<sup>1</sup>H spectrum of compound SI-10**

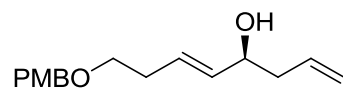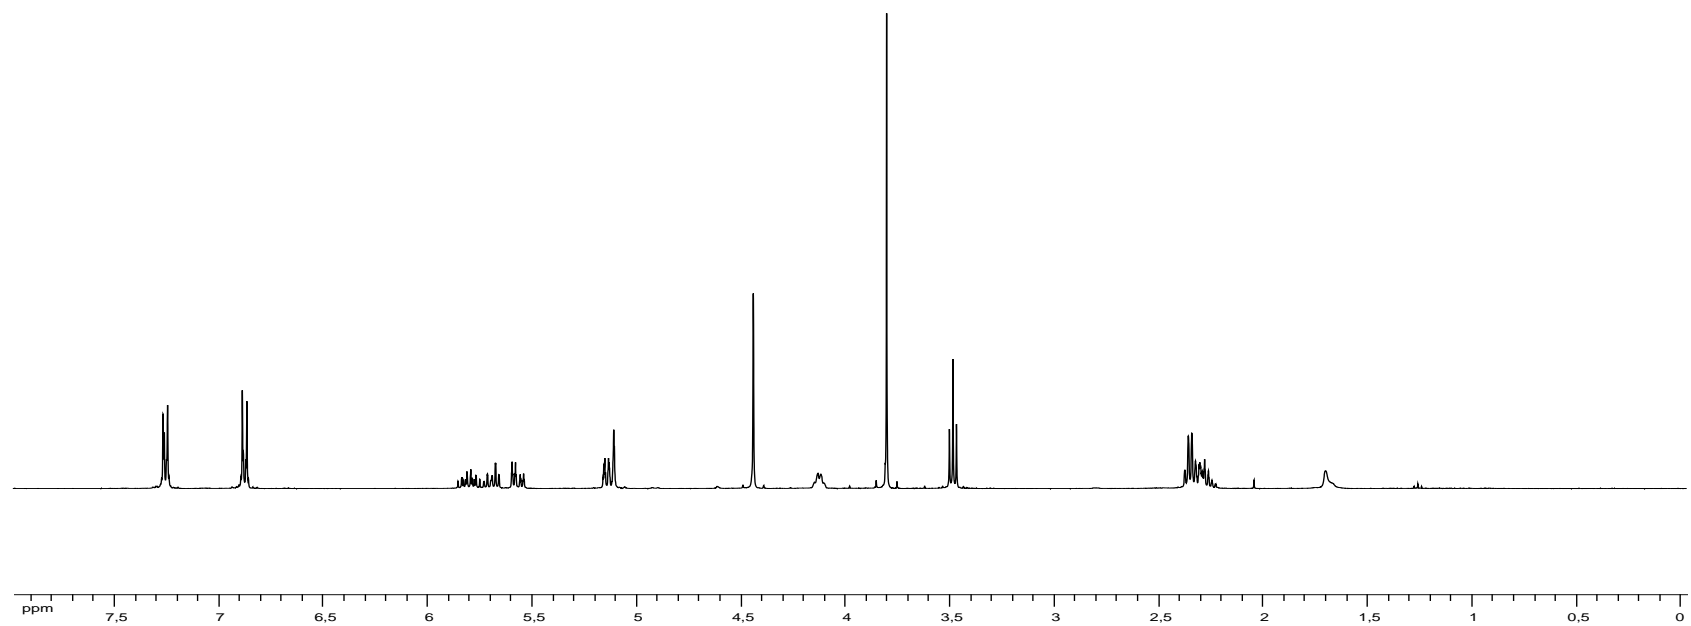

<sup>13</sup>C spectrum of compound SI-10

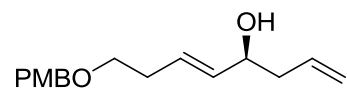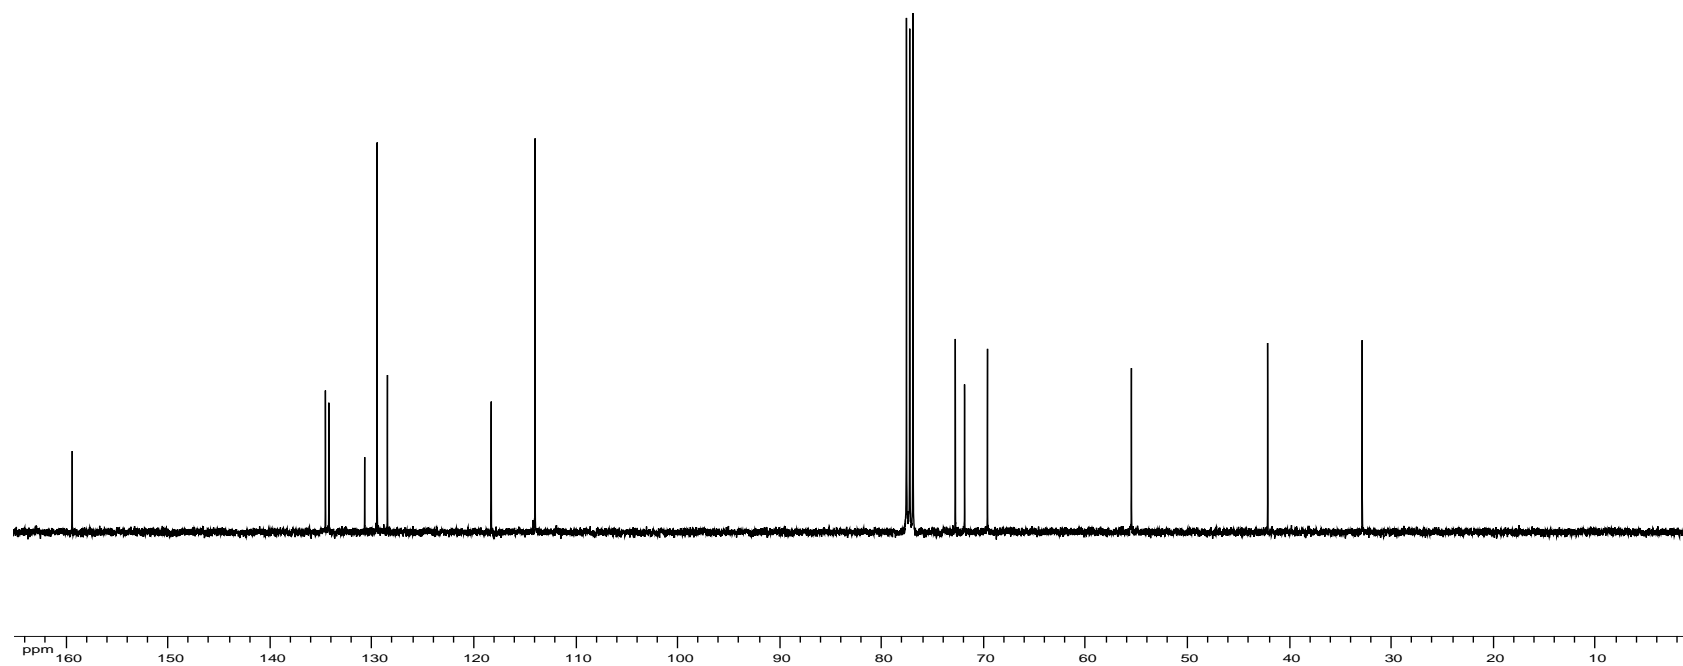

**<sup>1</sup>H spectrum of compound SI-11**

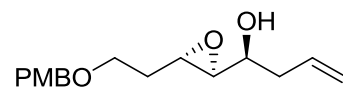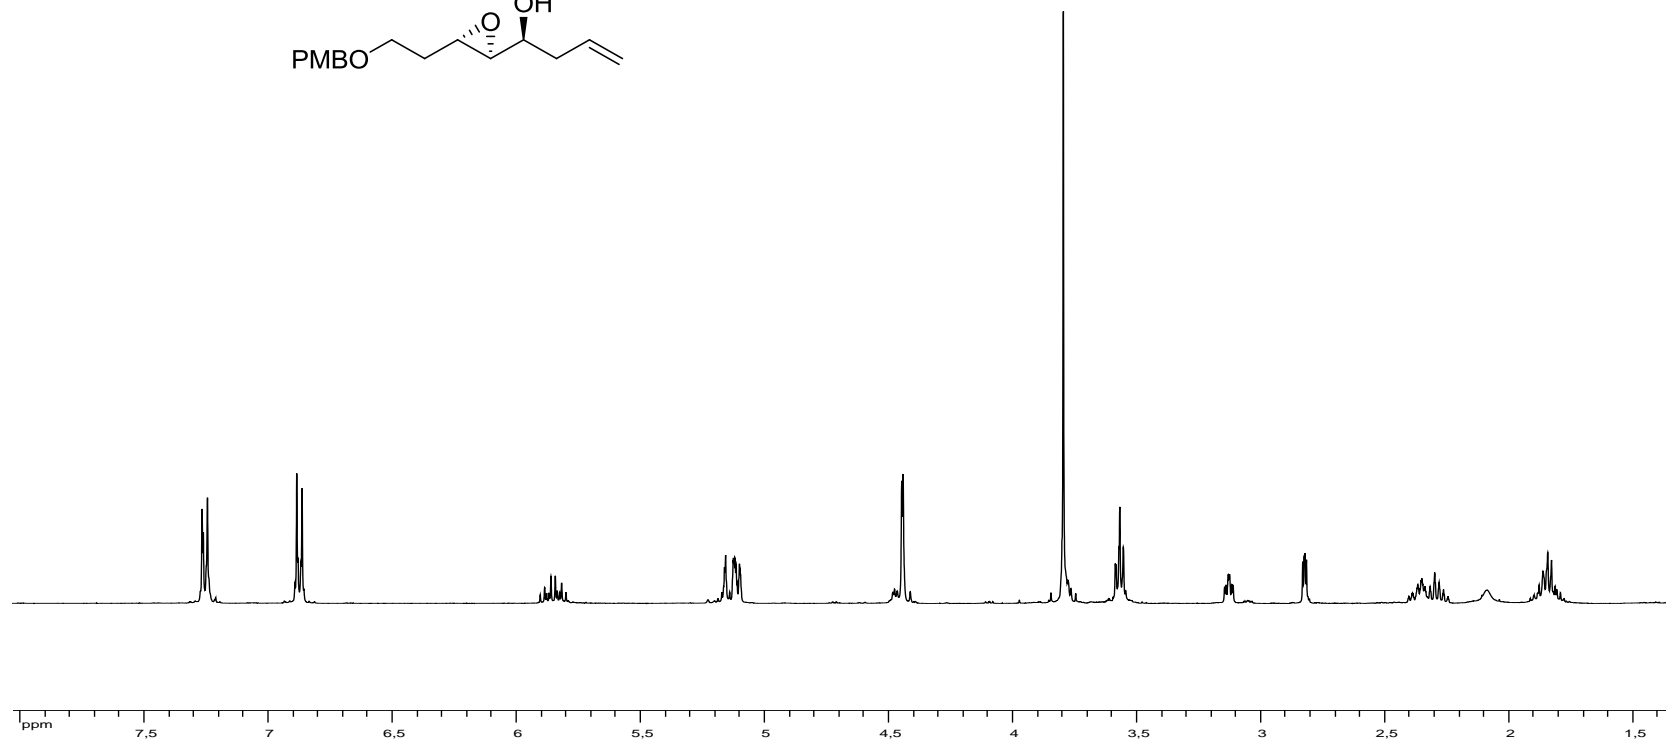

<sup>13</sup>C spectrum of compound SI-11

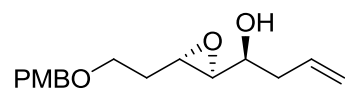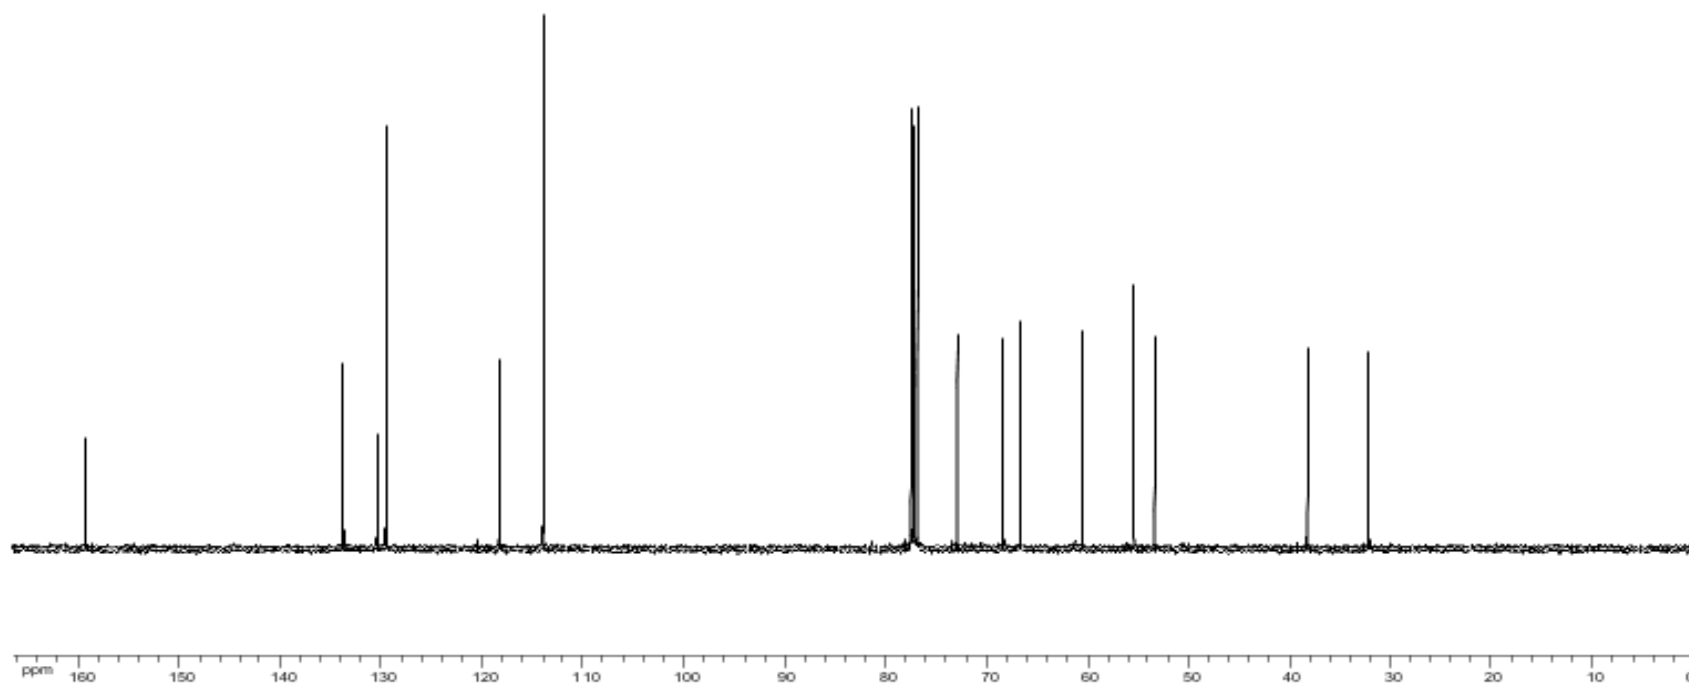

**<sup>1</sup>H spectrum of compound SI-12**

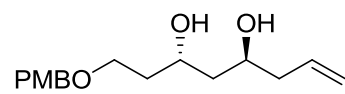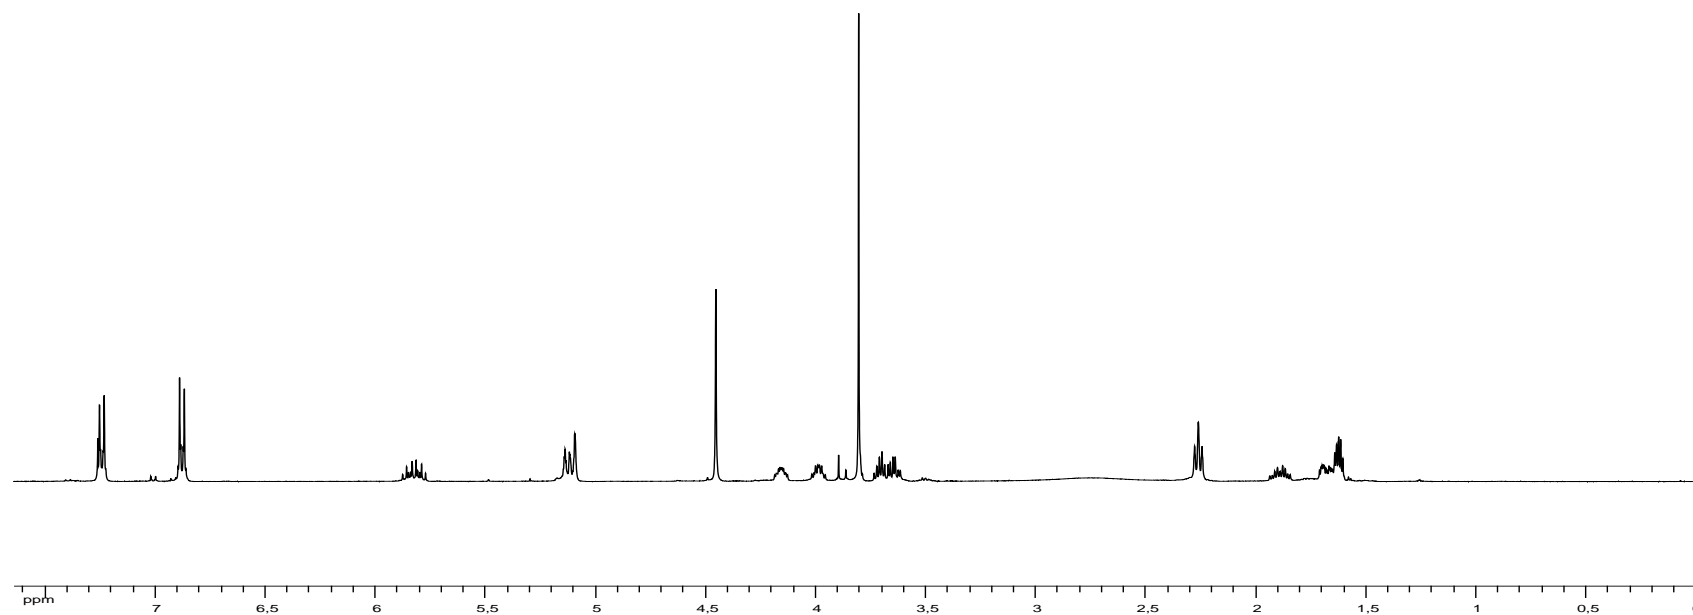



<sup>13</sup>C spectrum of compound SI-12

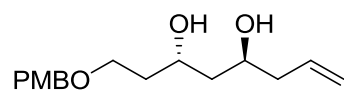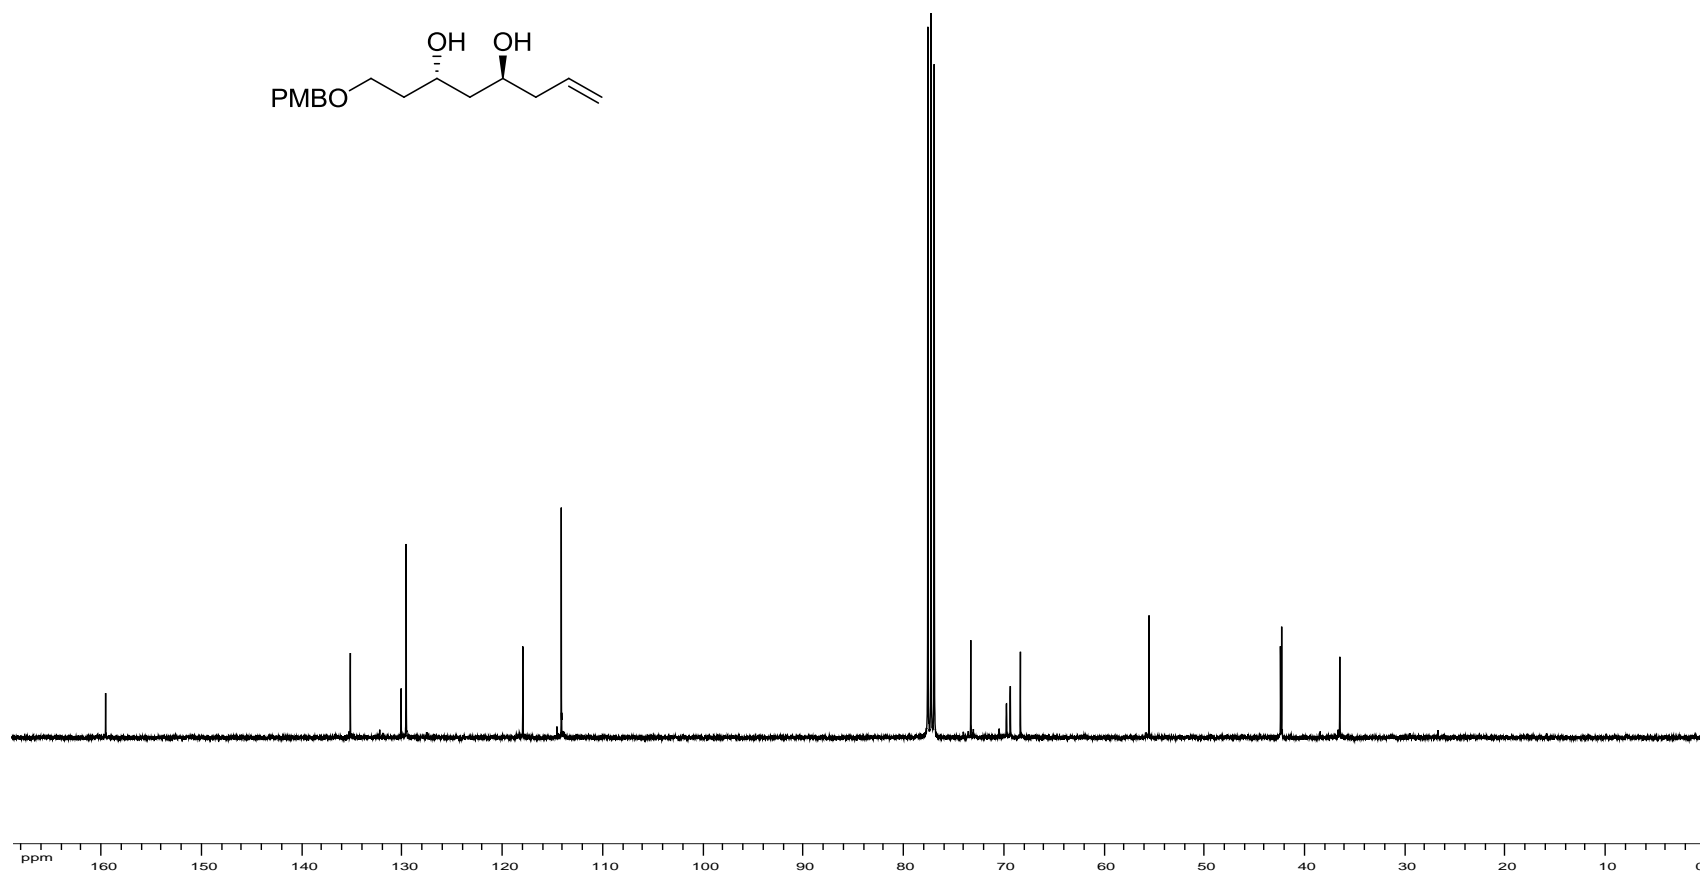

**<sup>1</sup>H spectrum of compound SI-13**

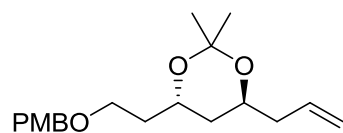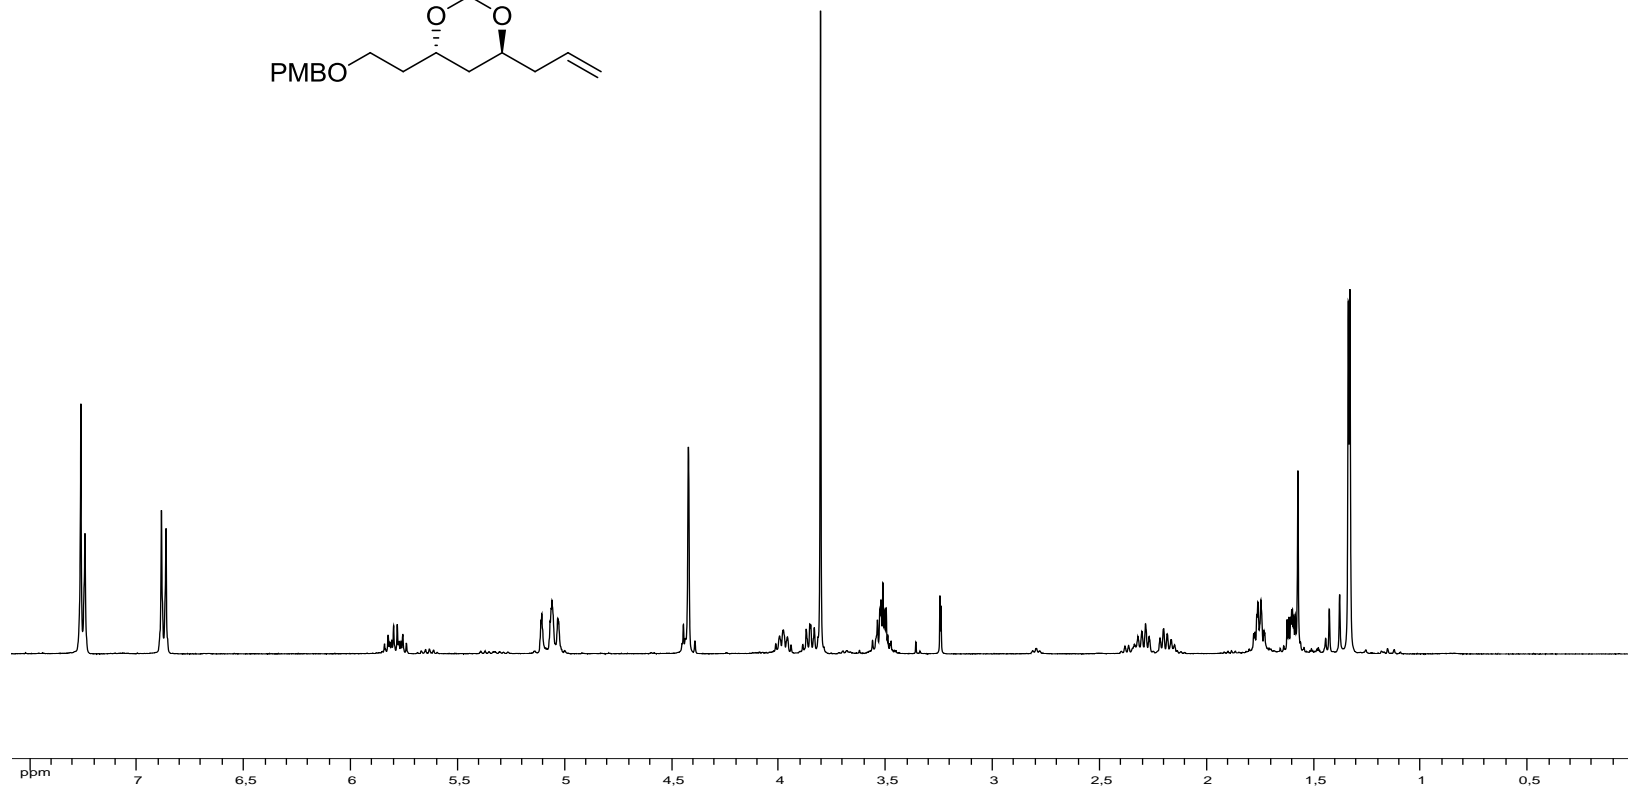

<sup>13</sup>C spectrum of compound SI-13

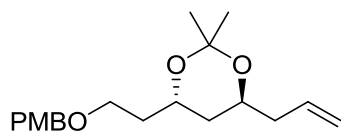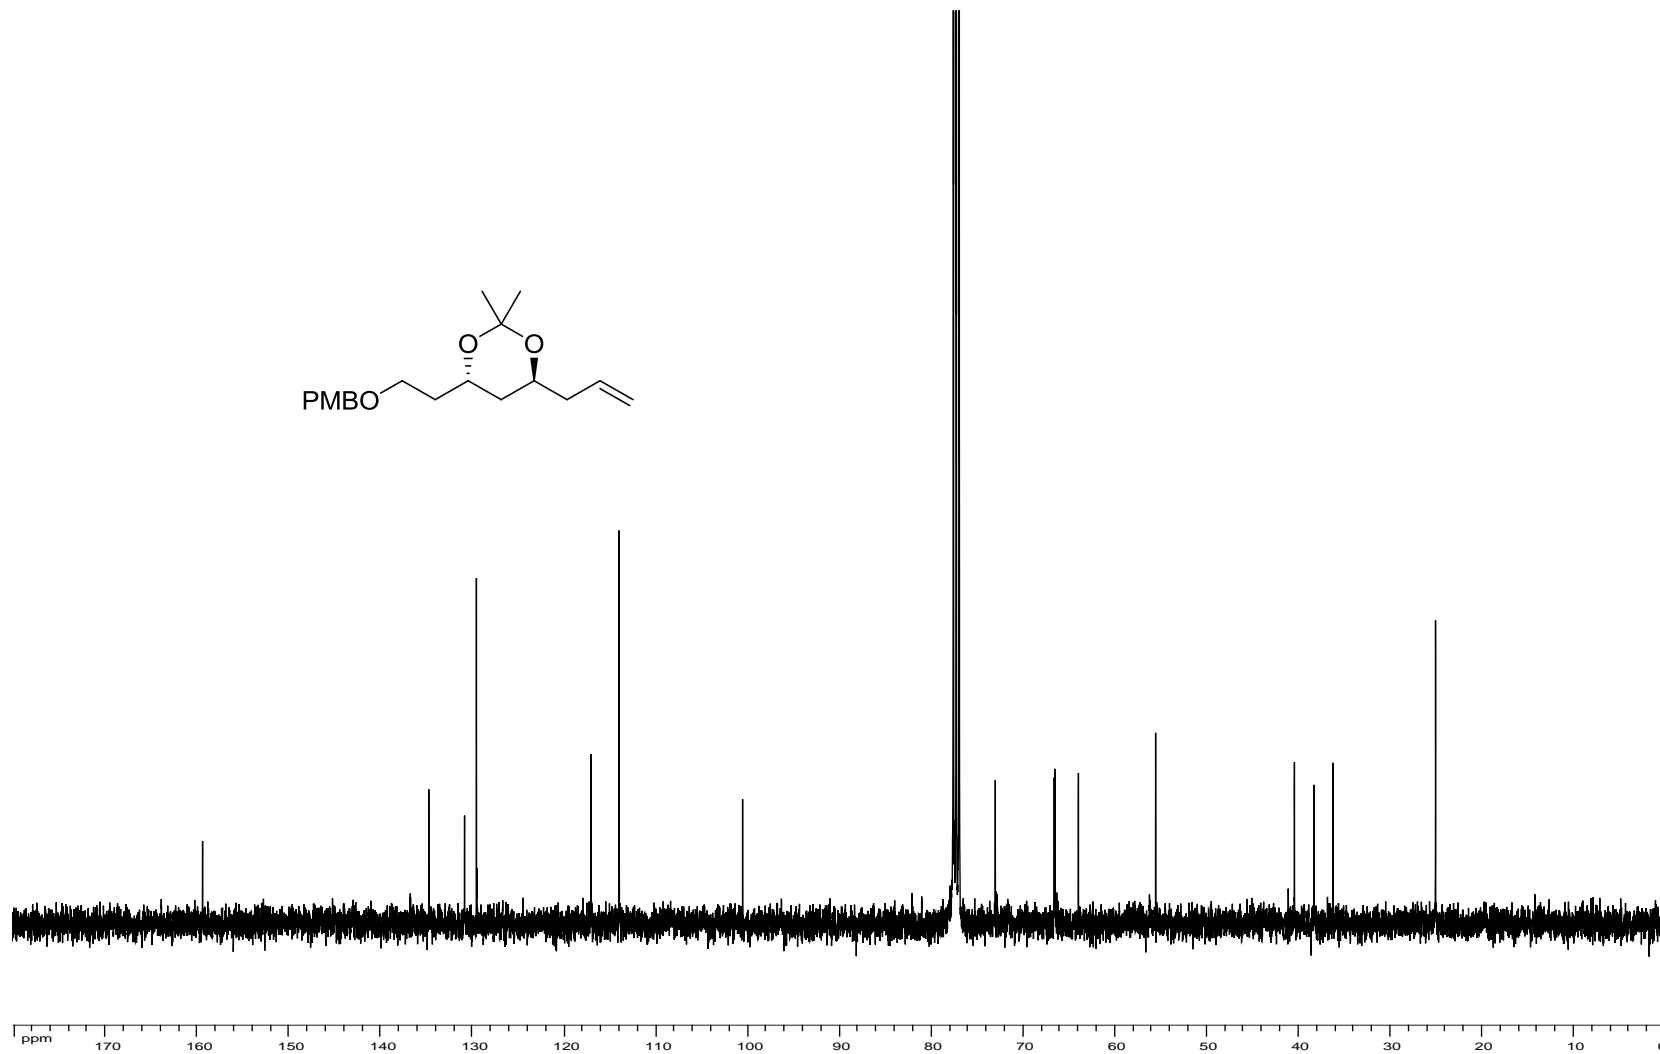

**$^1\text{H}$  spectrum of compound SI-14**

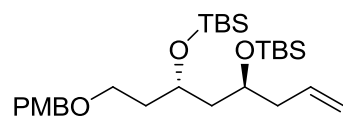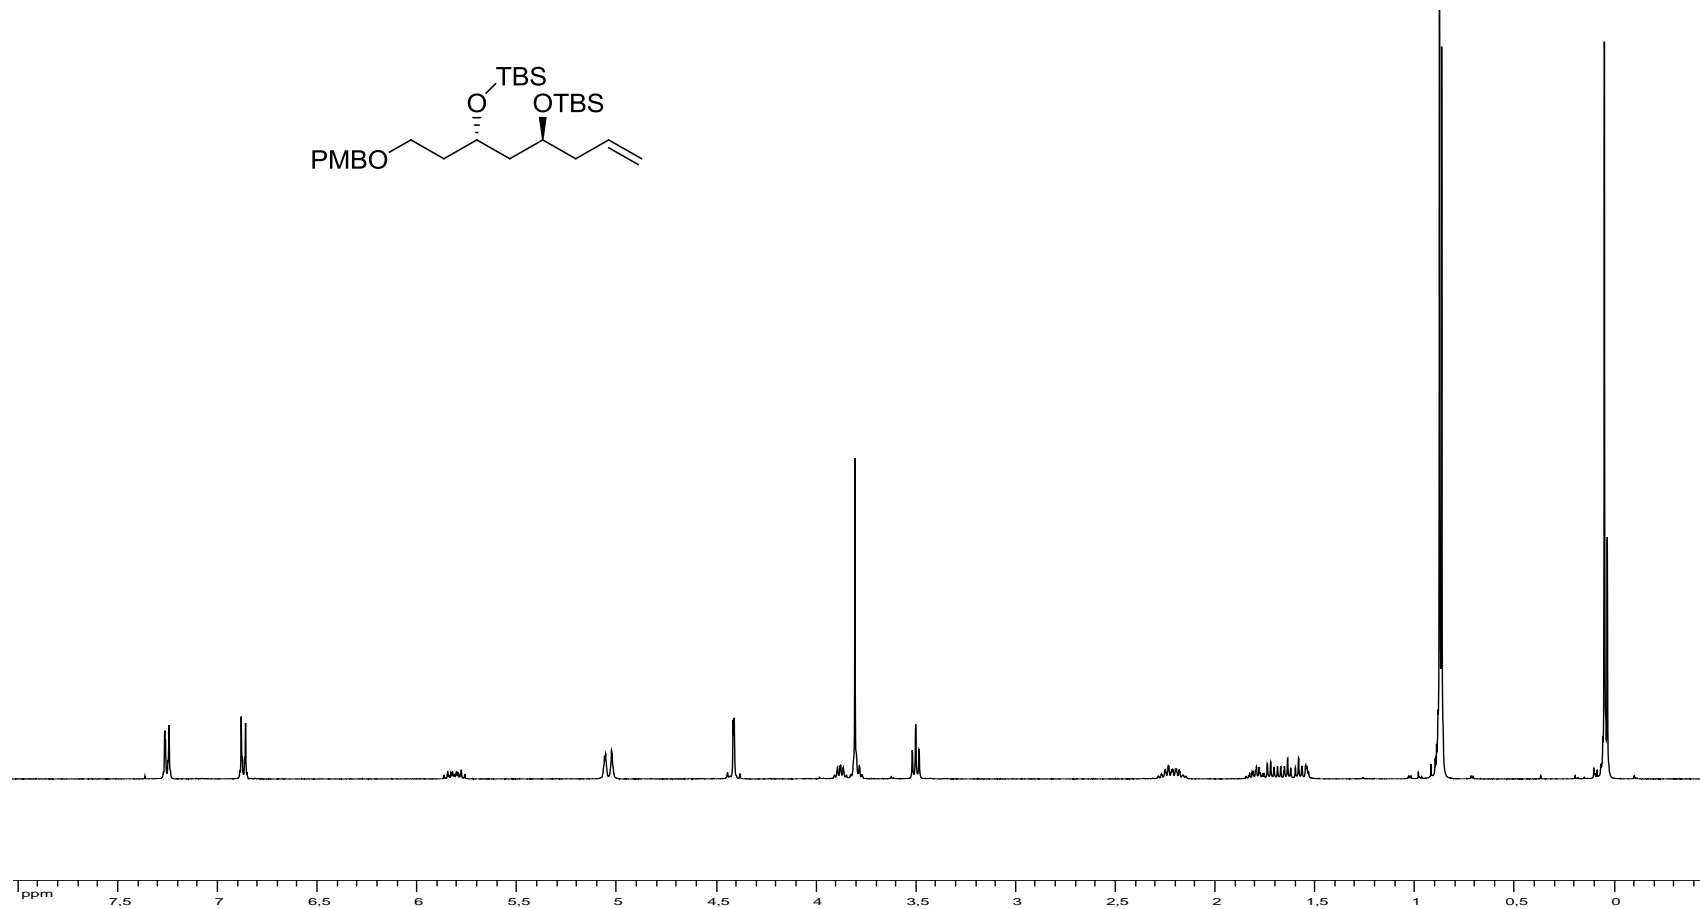

<sup>13</sup>C spectrum of compound SI-14

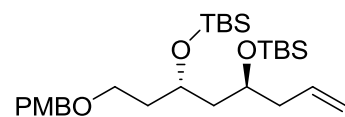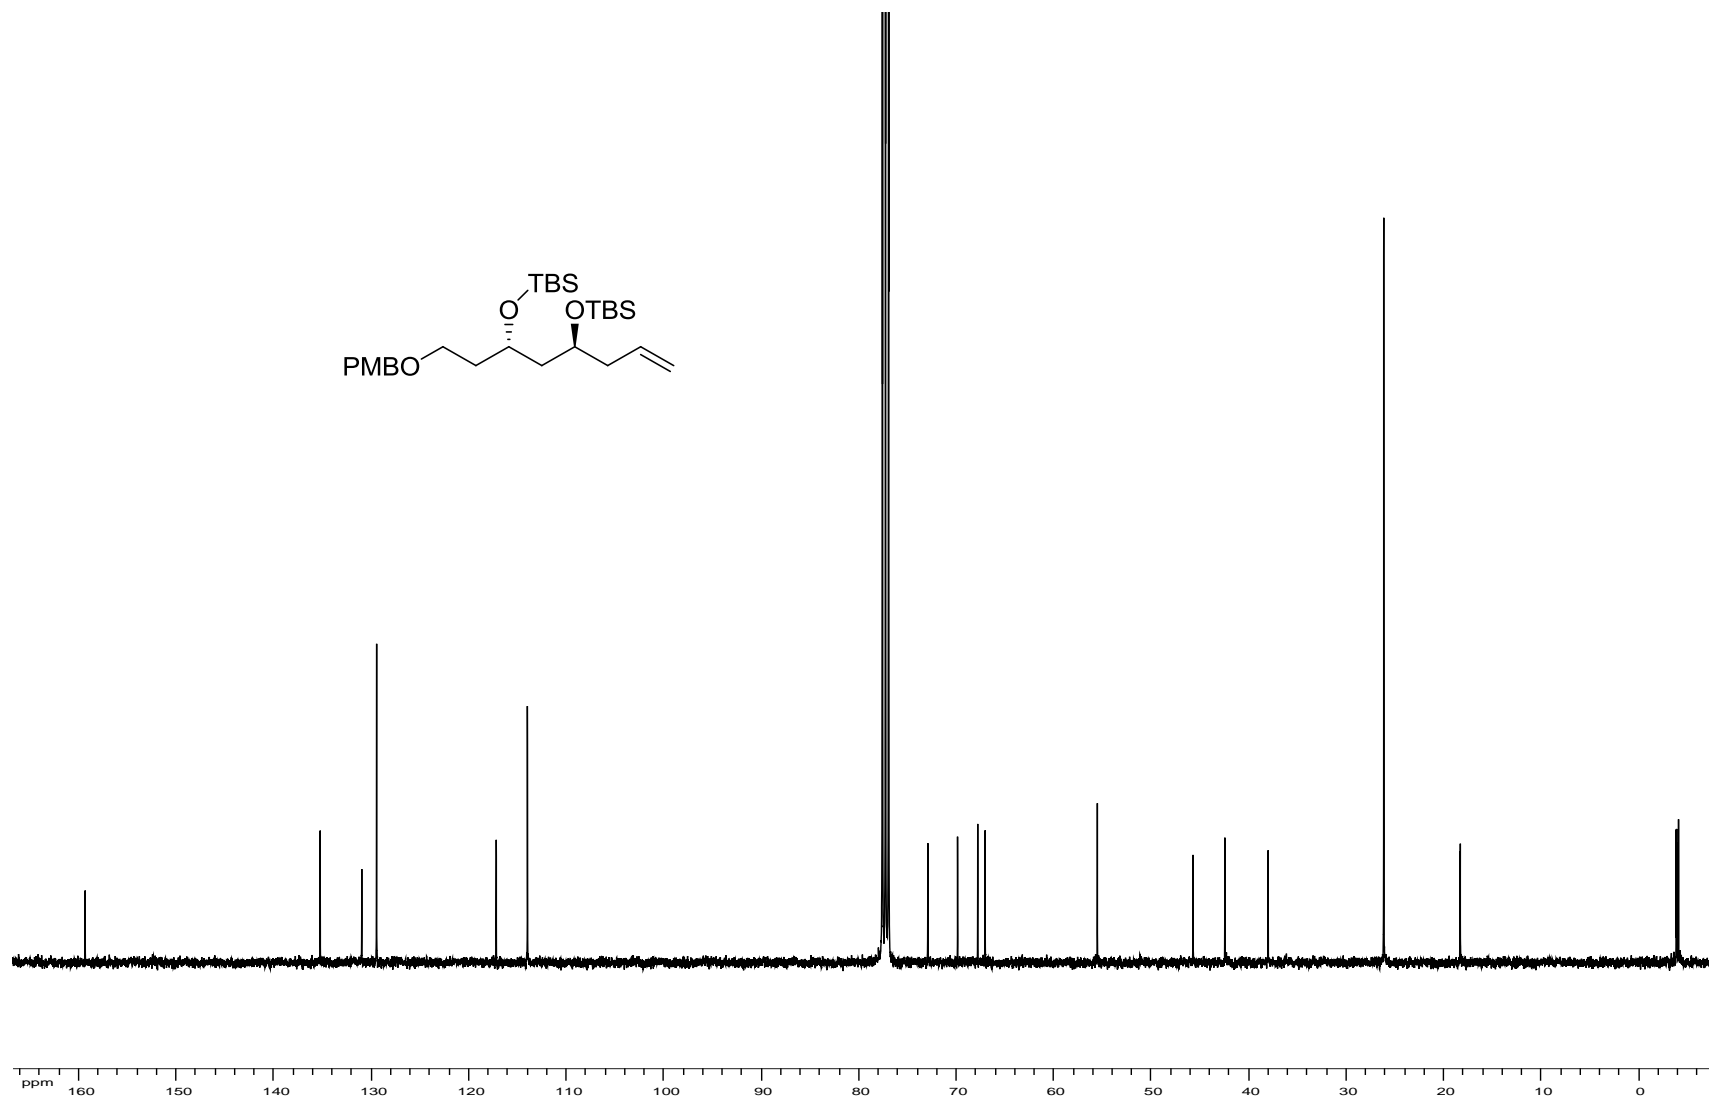

**<sup>1</sup>H spectrum of compound 18**

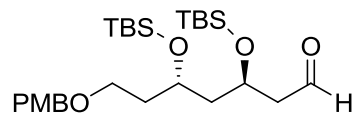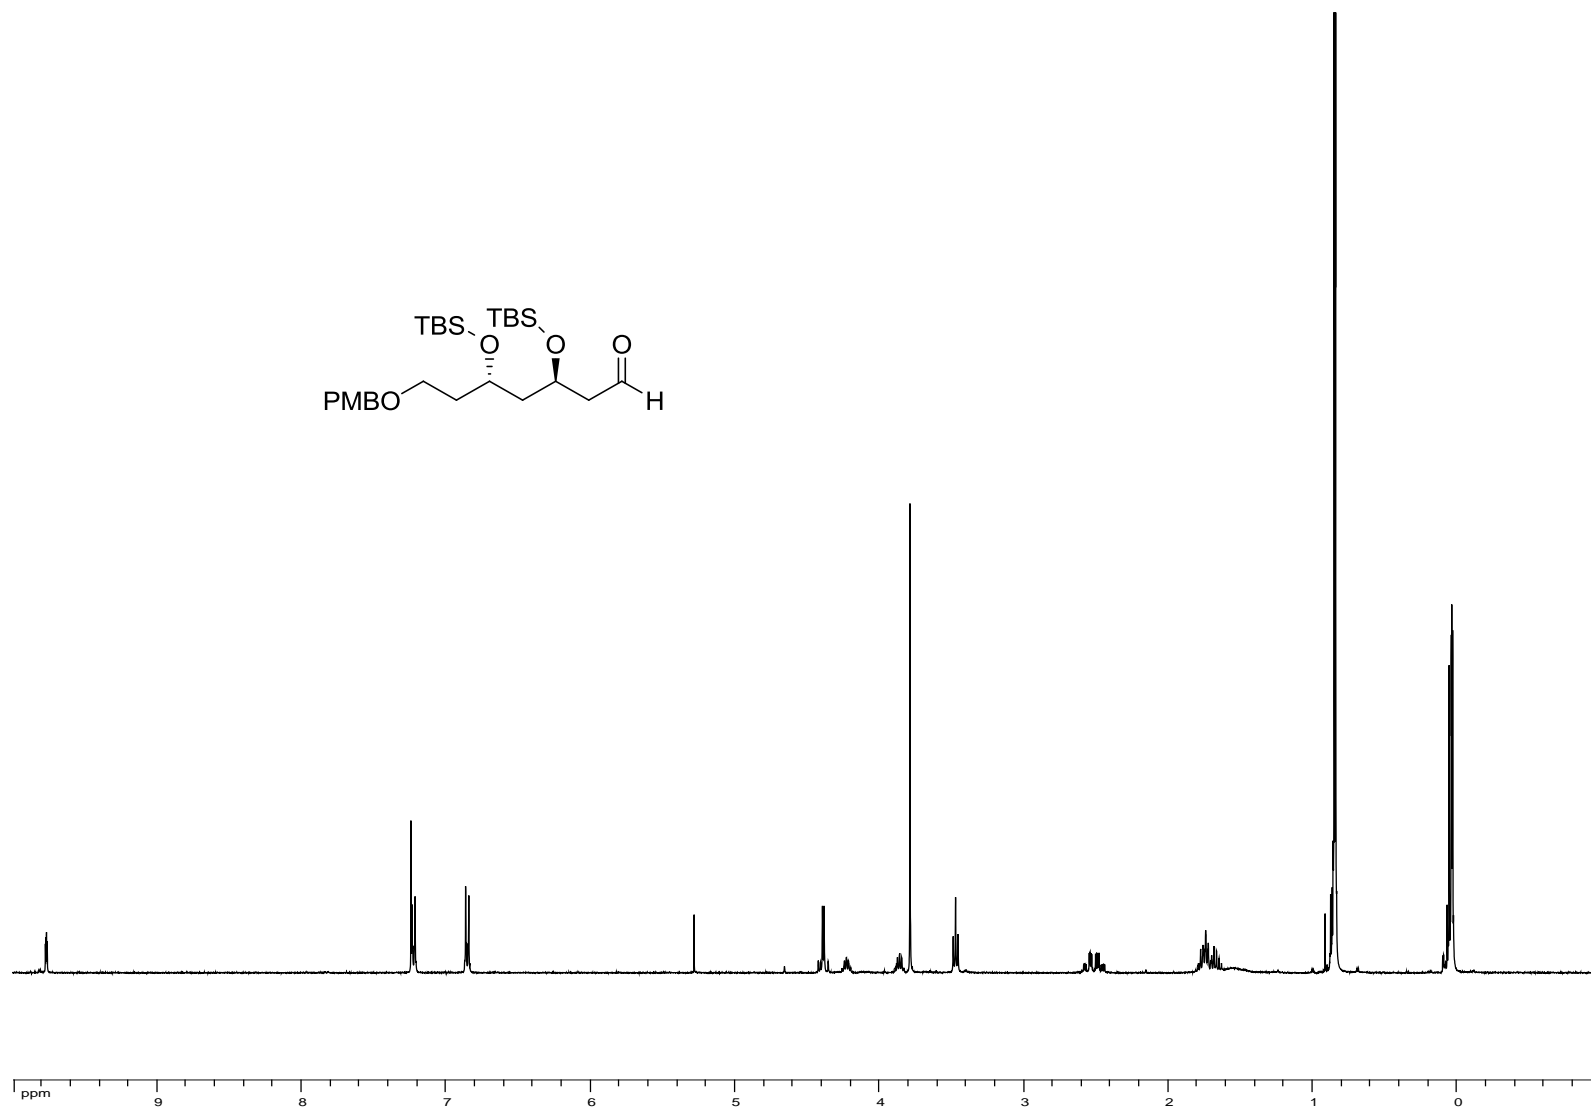

<sup>13</sup>C spectrum of compound 18

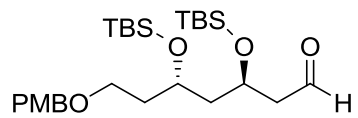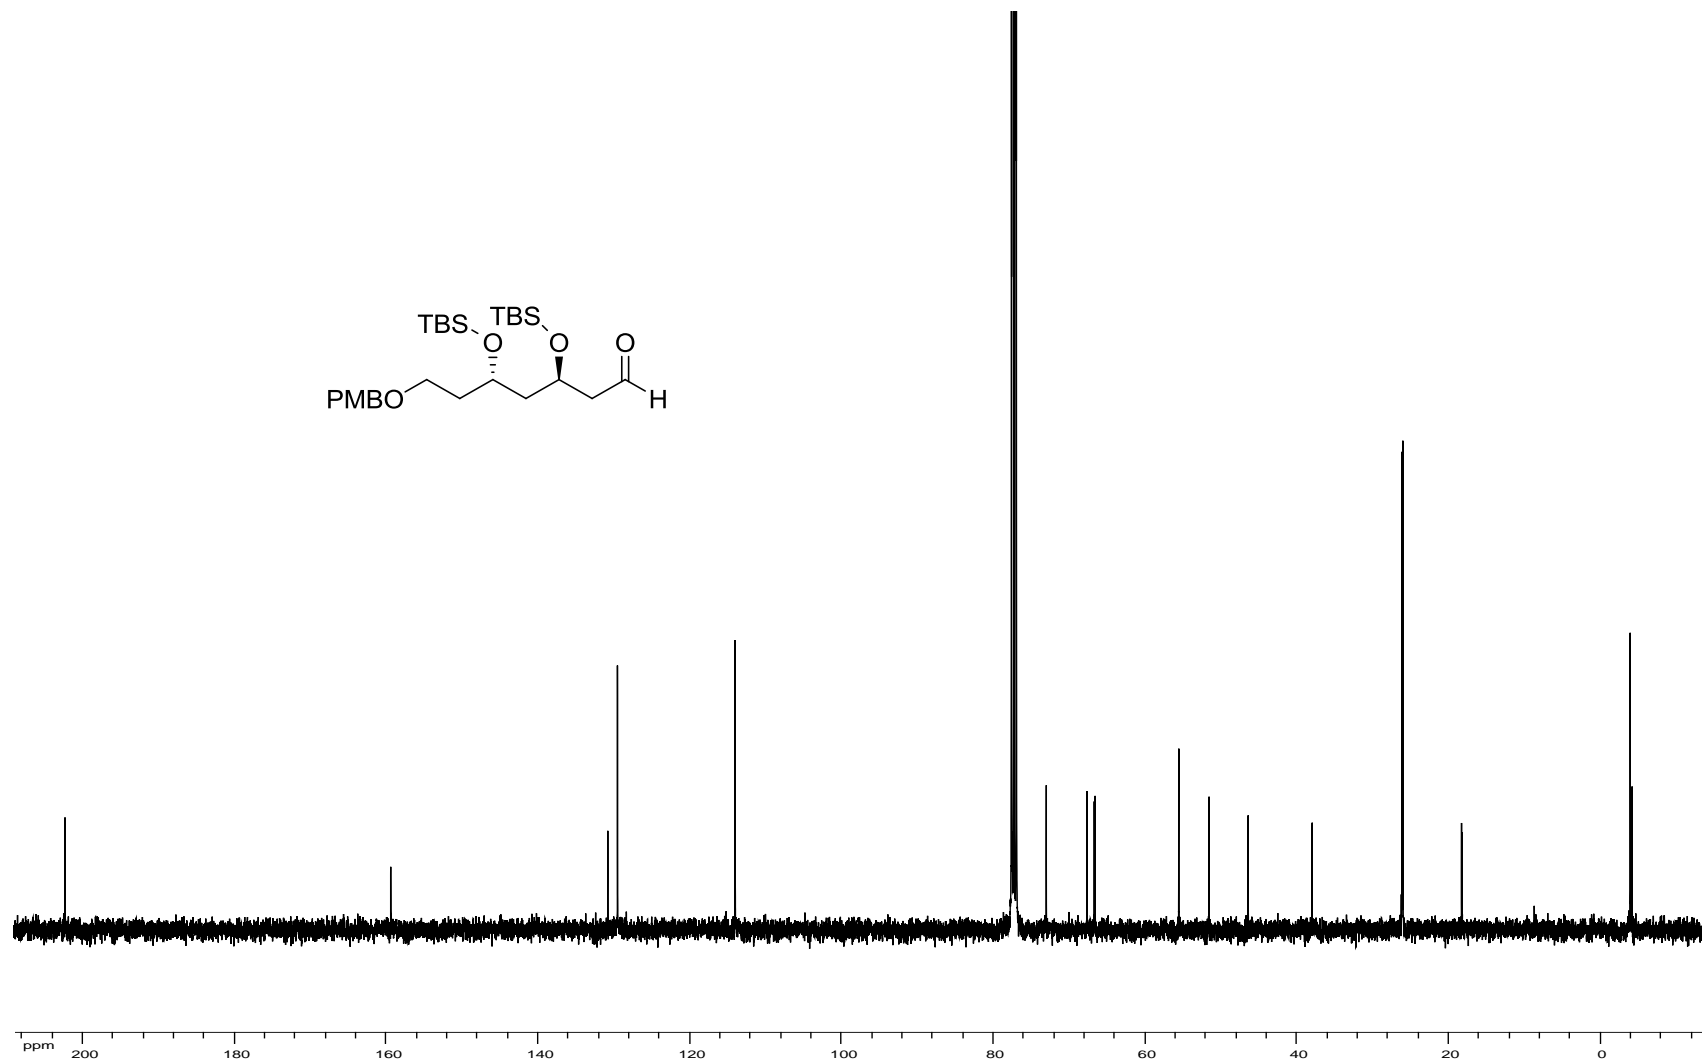

**$^1\text{H}$  spectrum of compound SI-18**

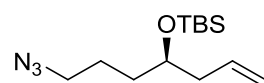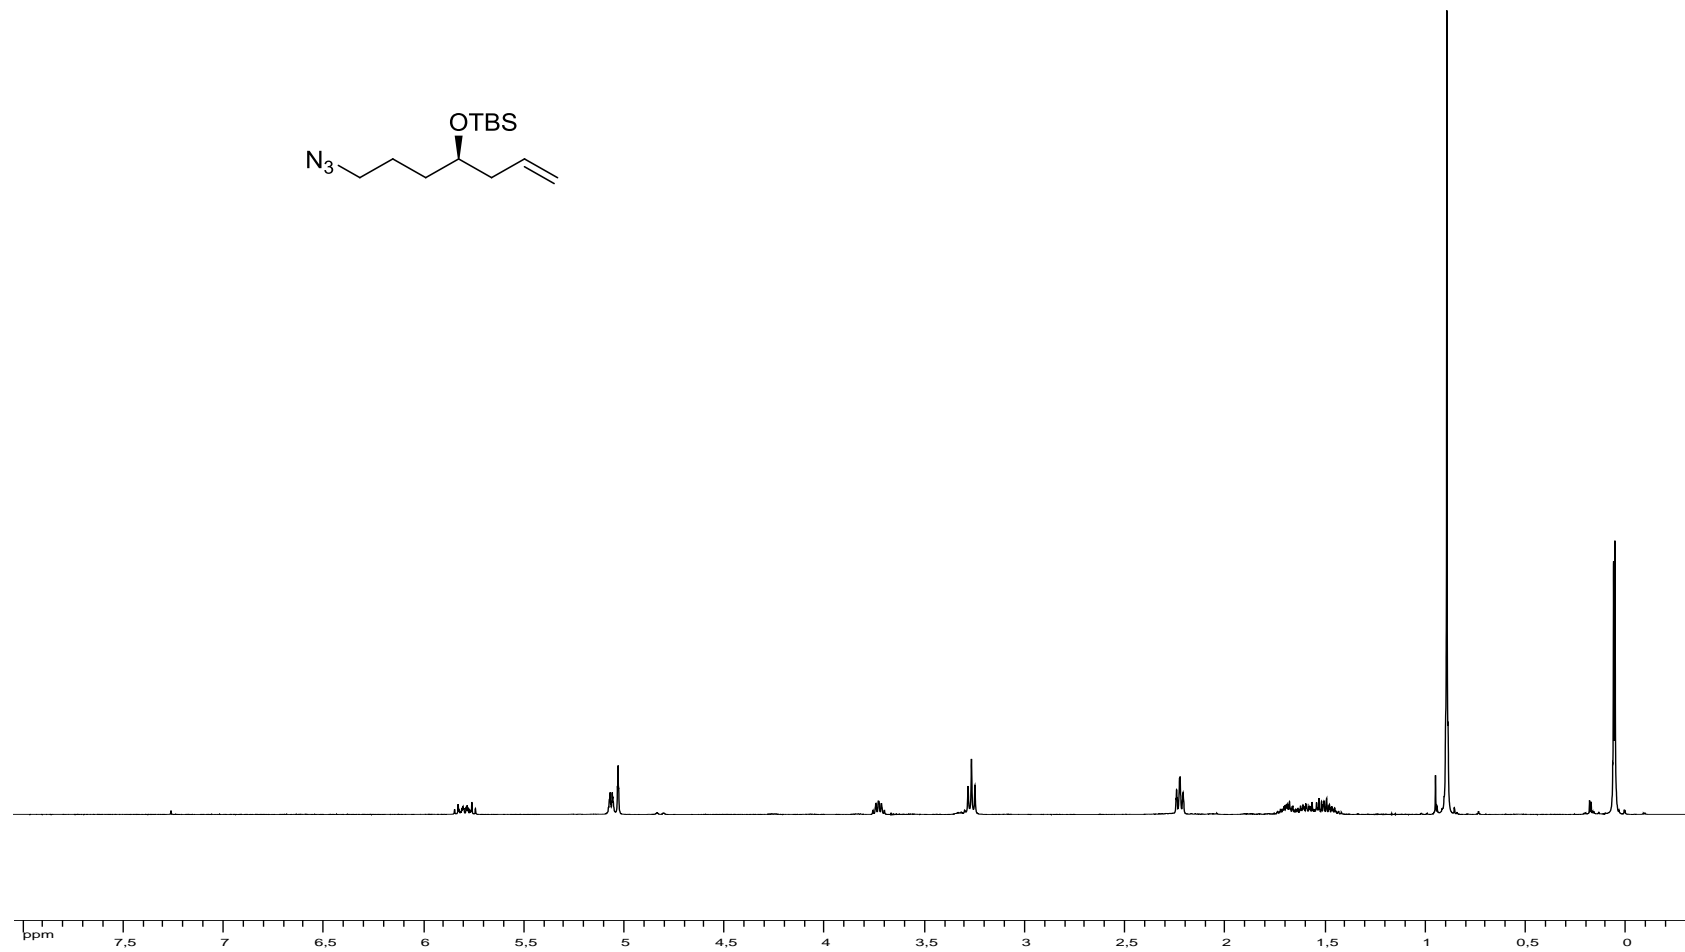



$^{13}\text{C}$  spectrum of compound SI-18

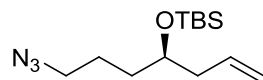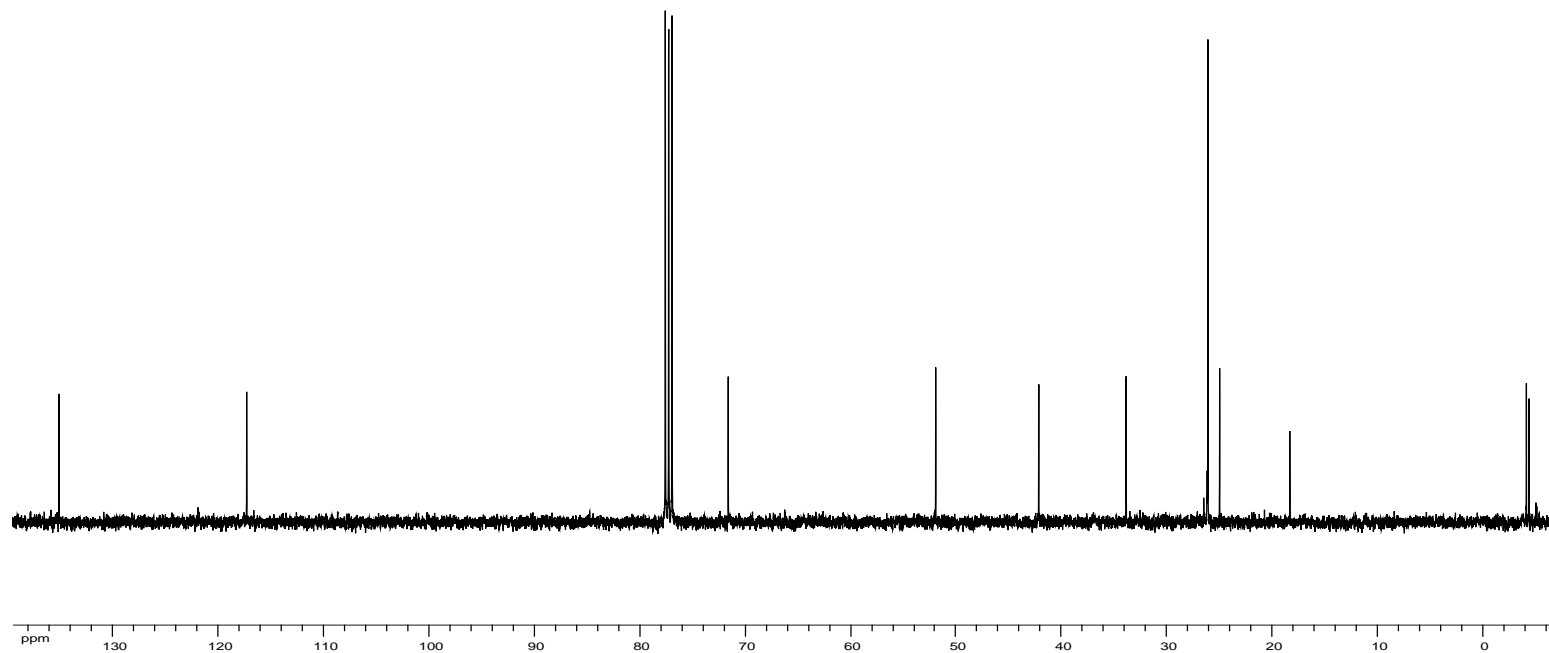

<sup>1</sup>H spectrum of compound SI-19

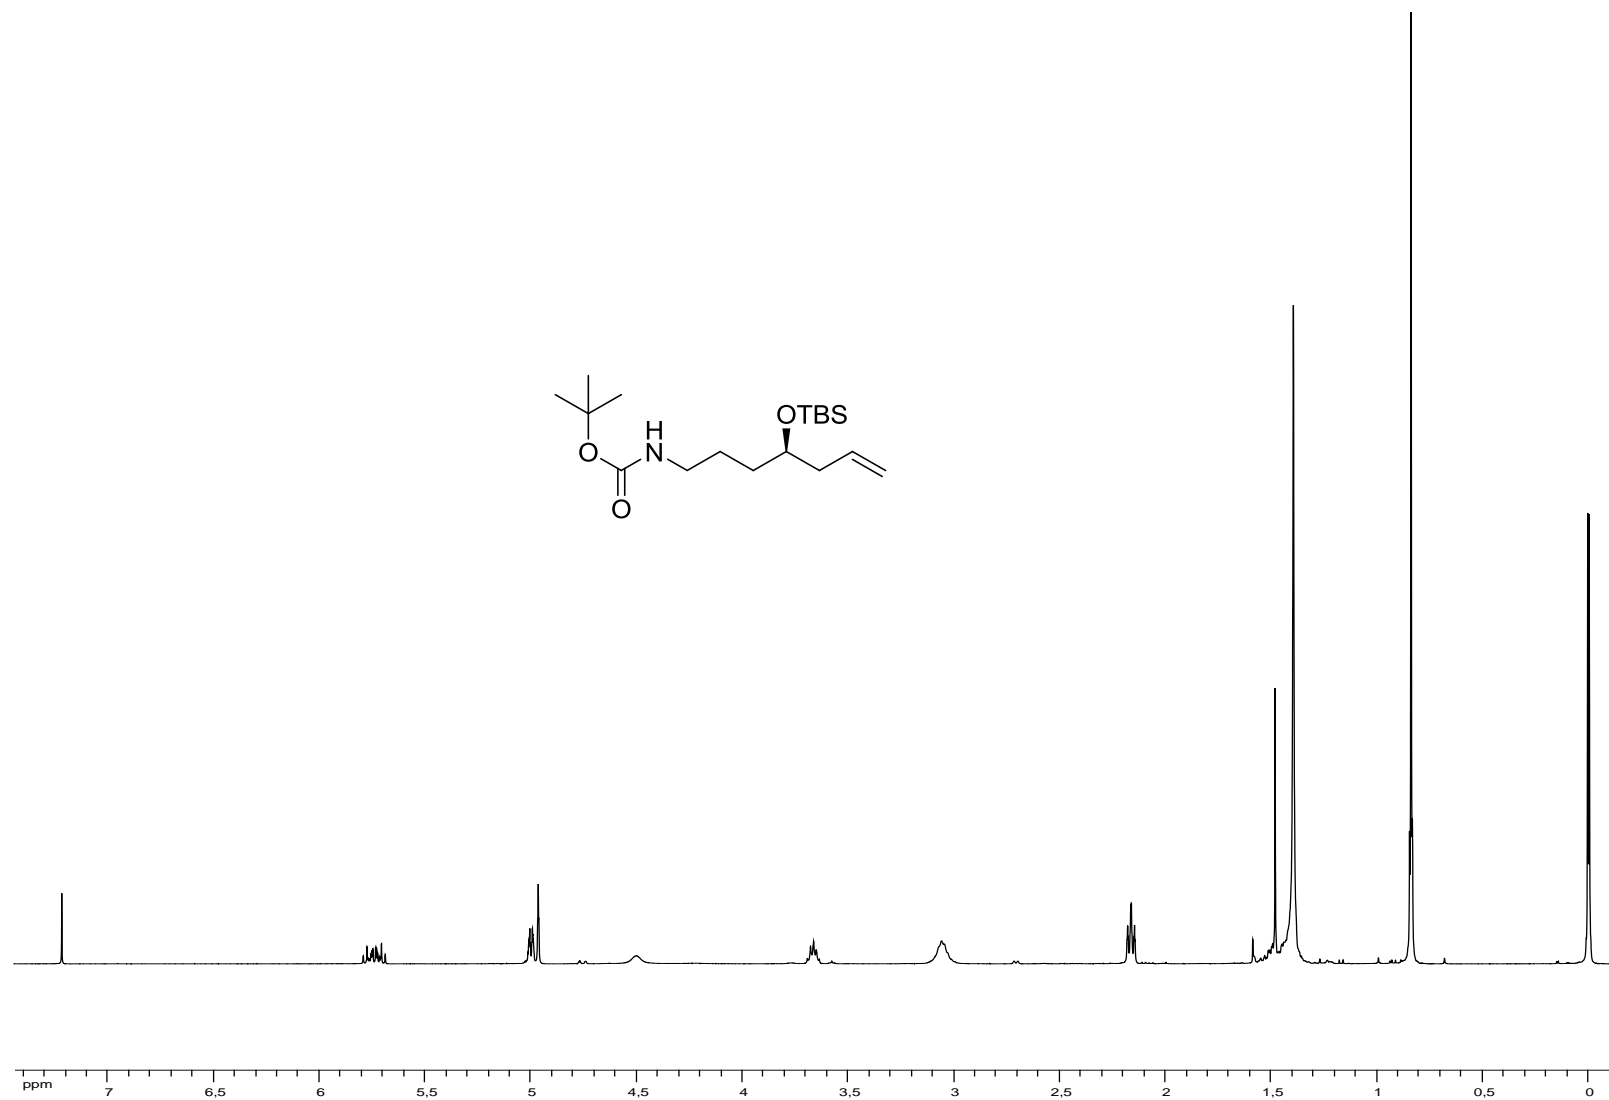

<sup>13</sup>C spectrum of compound SI-19

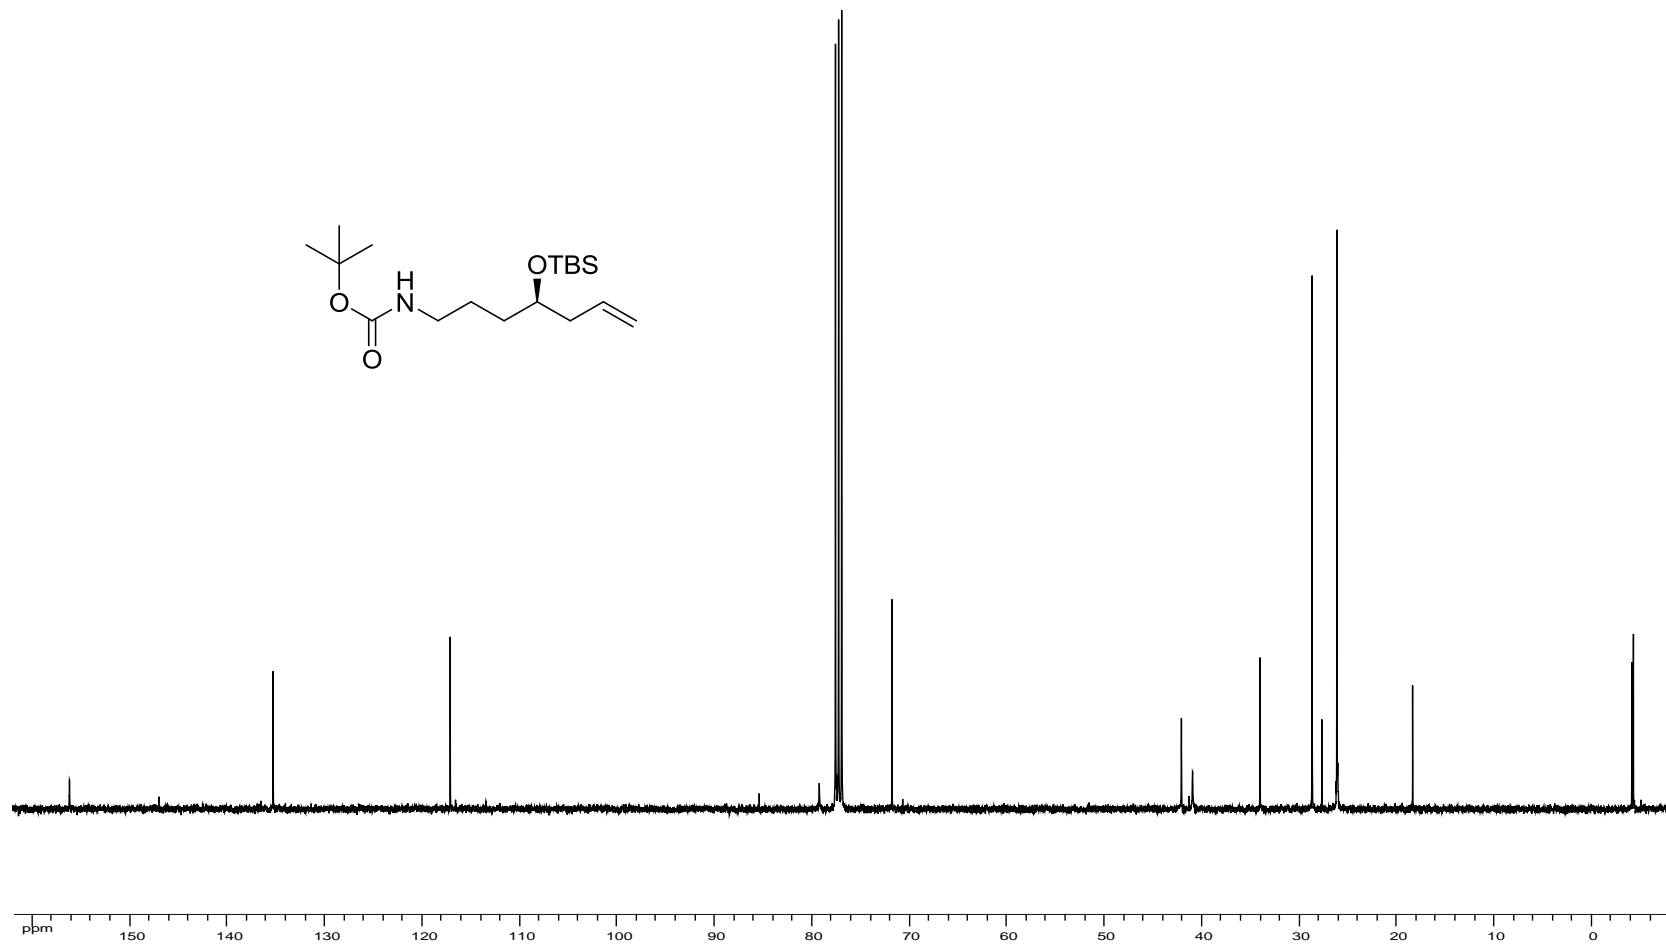

**<sup>1</sup>H spectrum of compound 17**

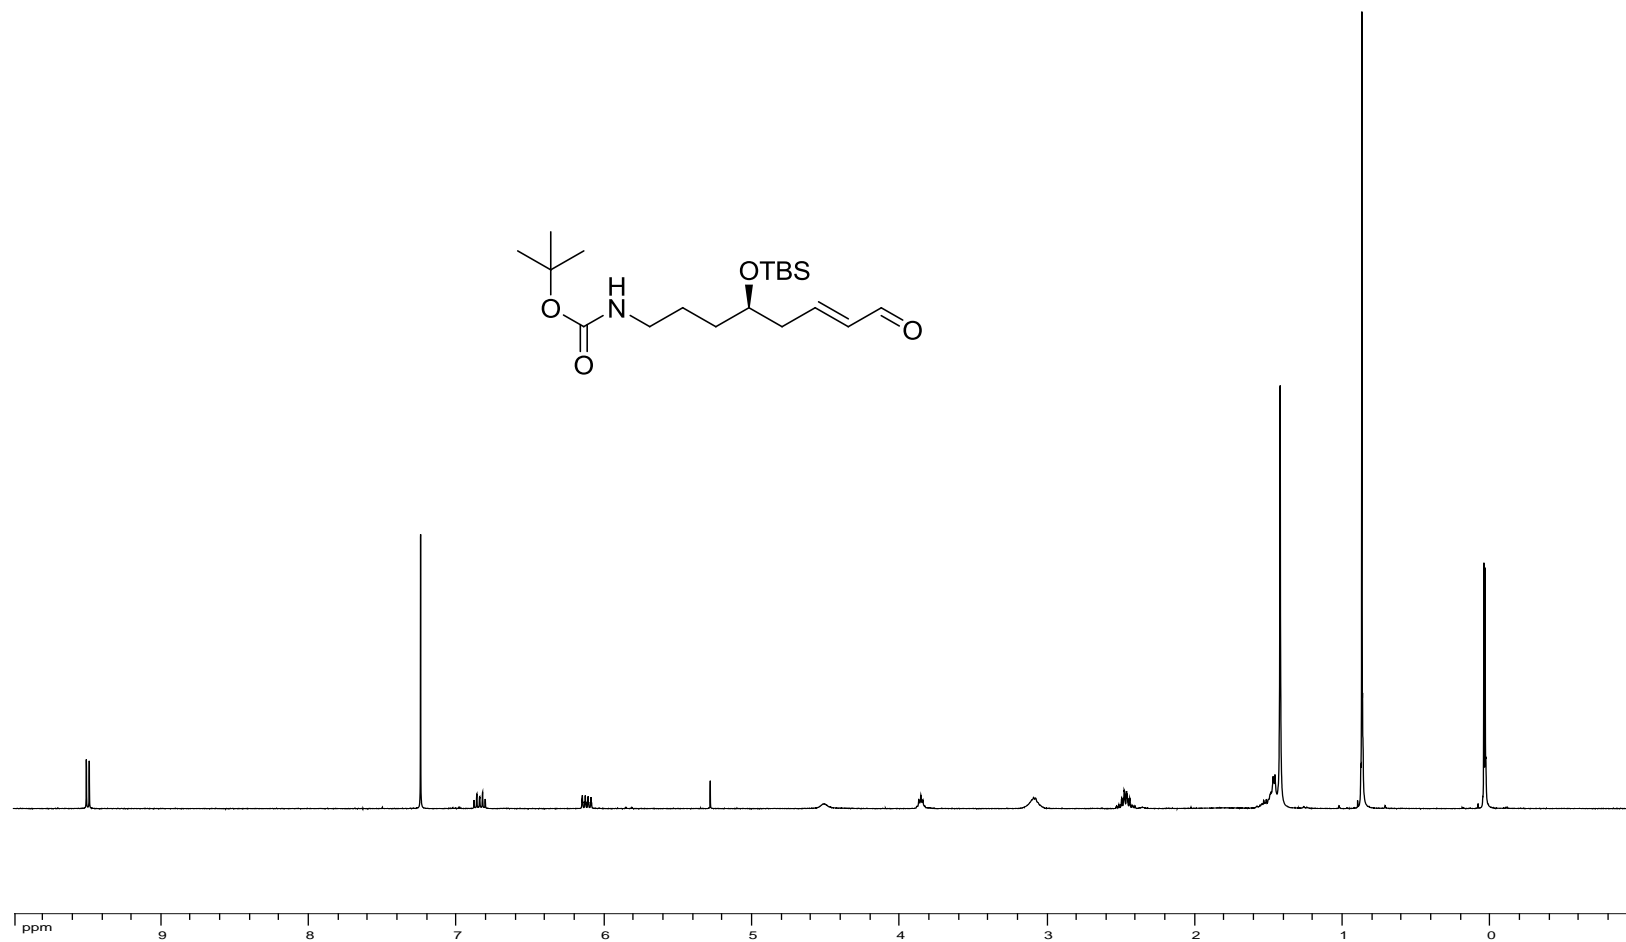

<sup>13</sup>C spectrum of compound 17

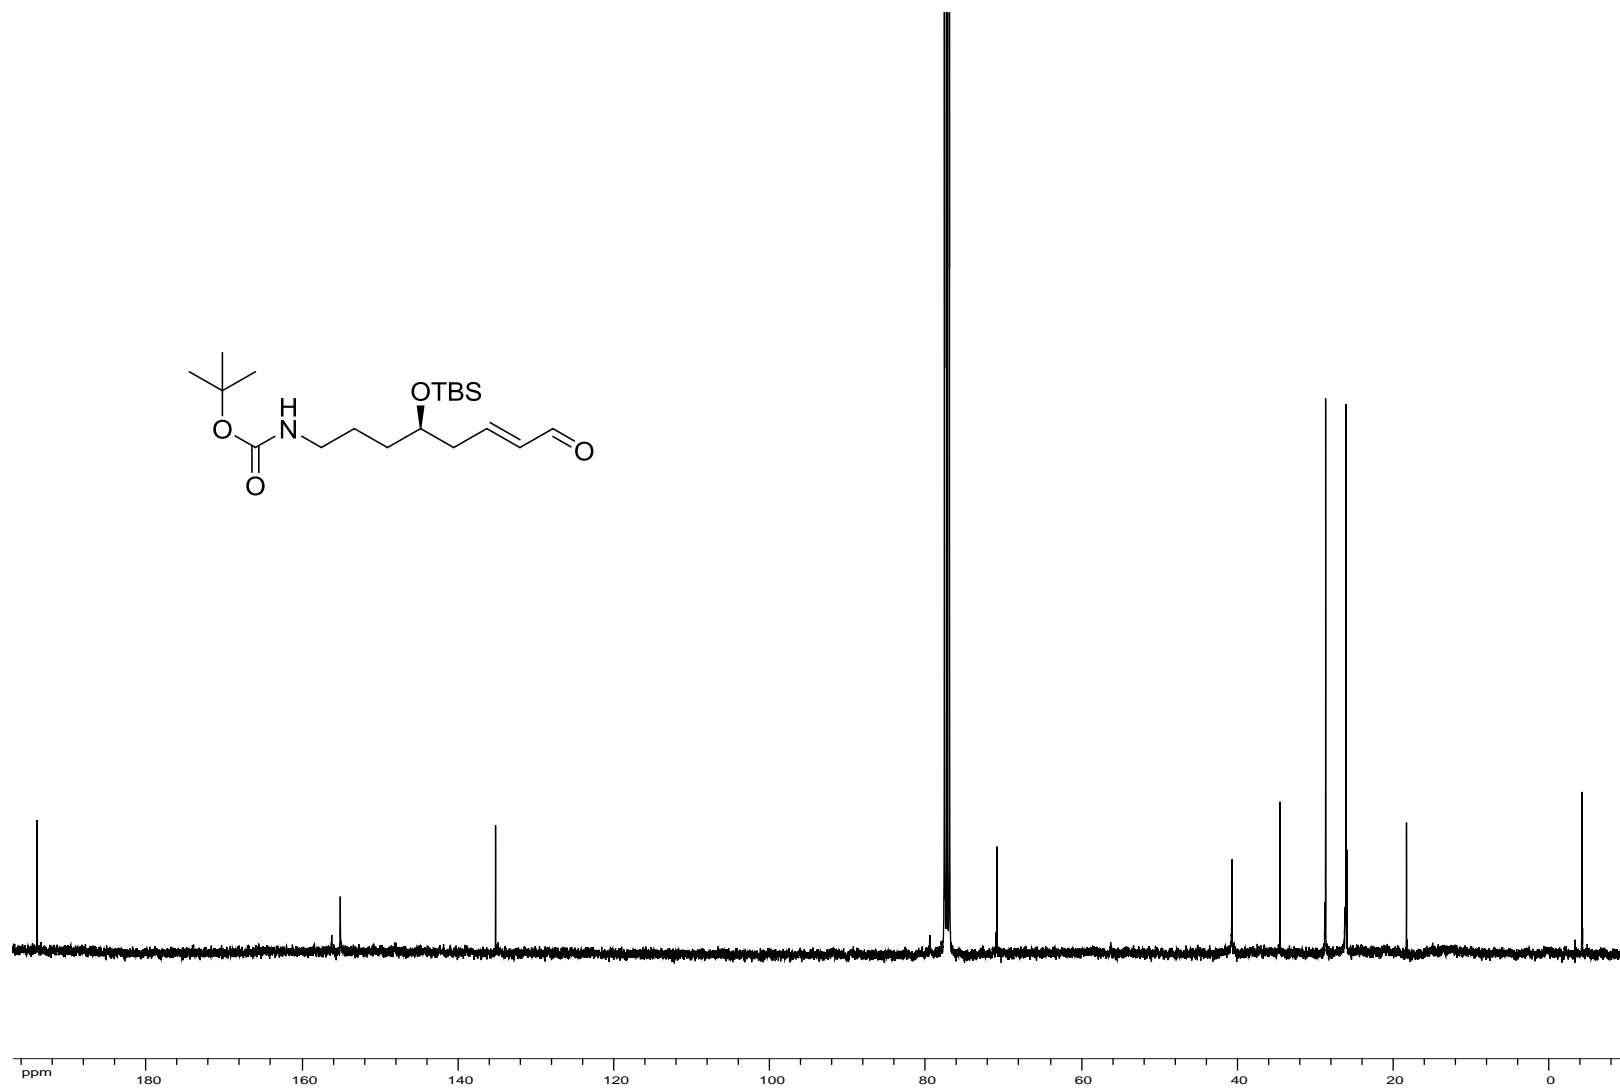

**<sup>1</sup>H spectrum of compound 19**

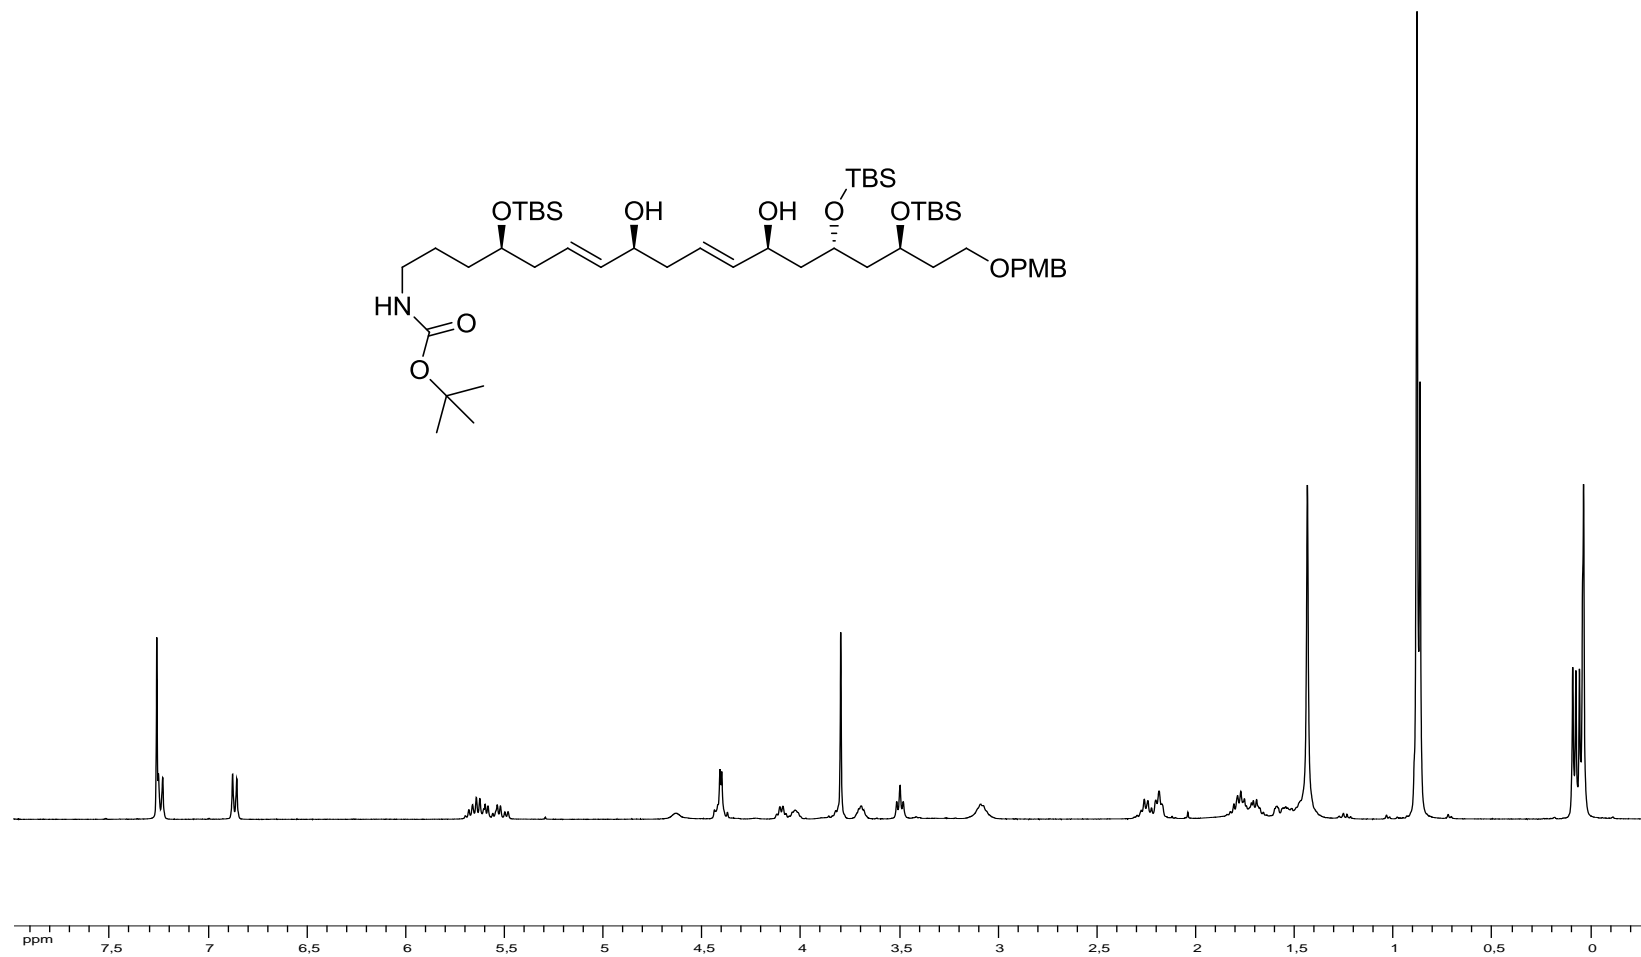

<sup>13</sup>C spectrum of compound 19

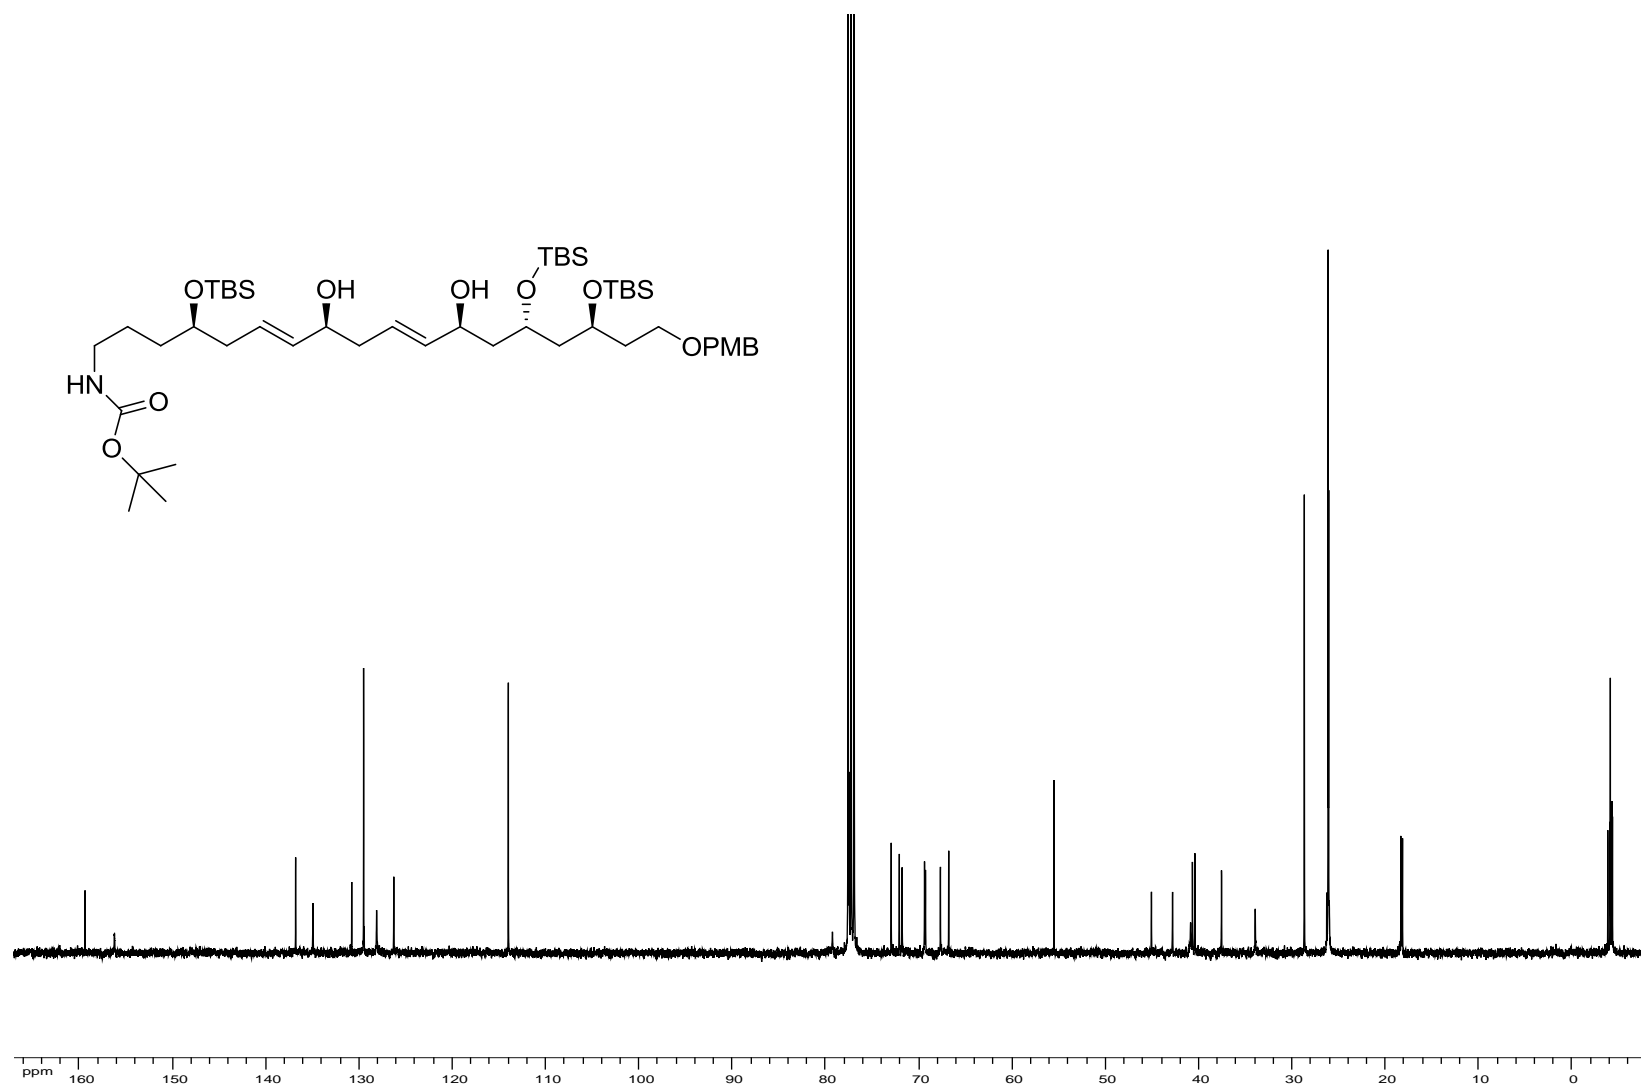

**<sup>1</sup>H spectrum of compound 20**

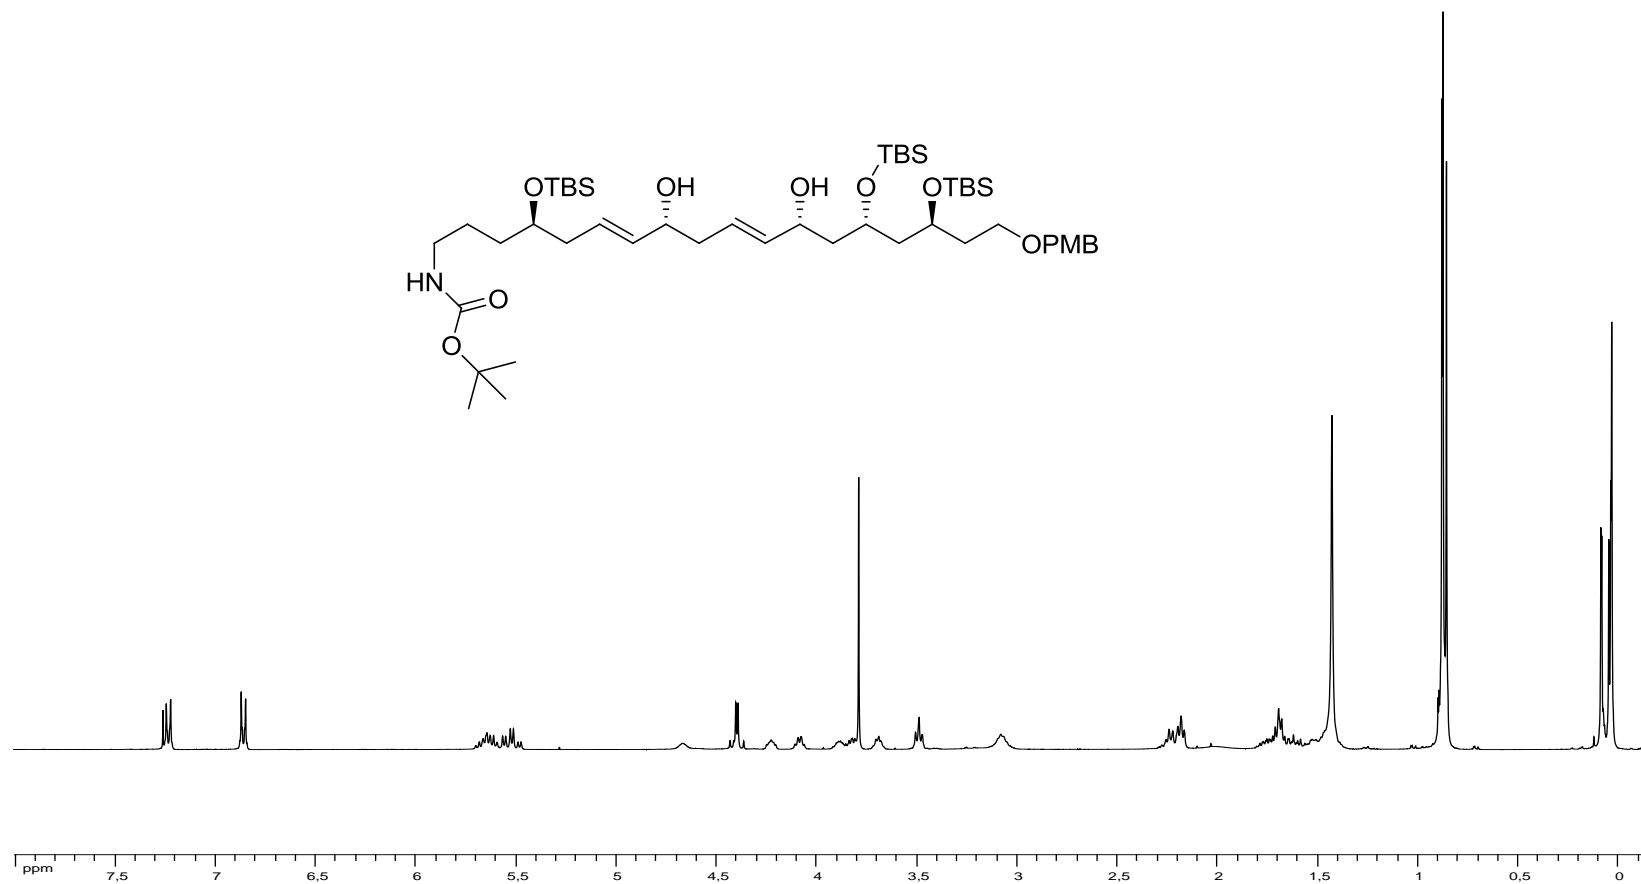



<sup>13</sup>C spectrum of compound 20

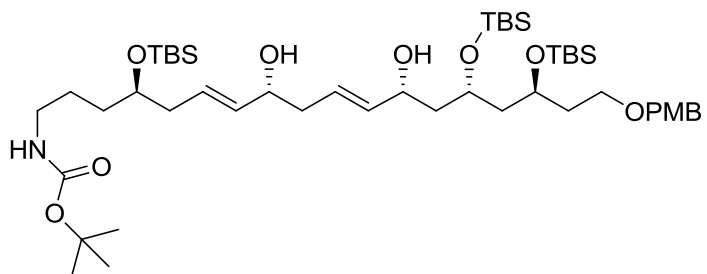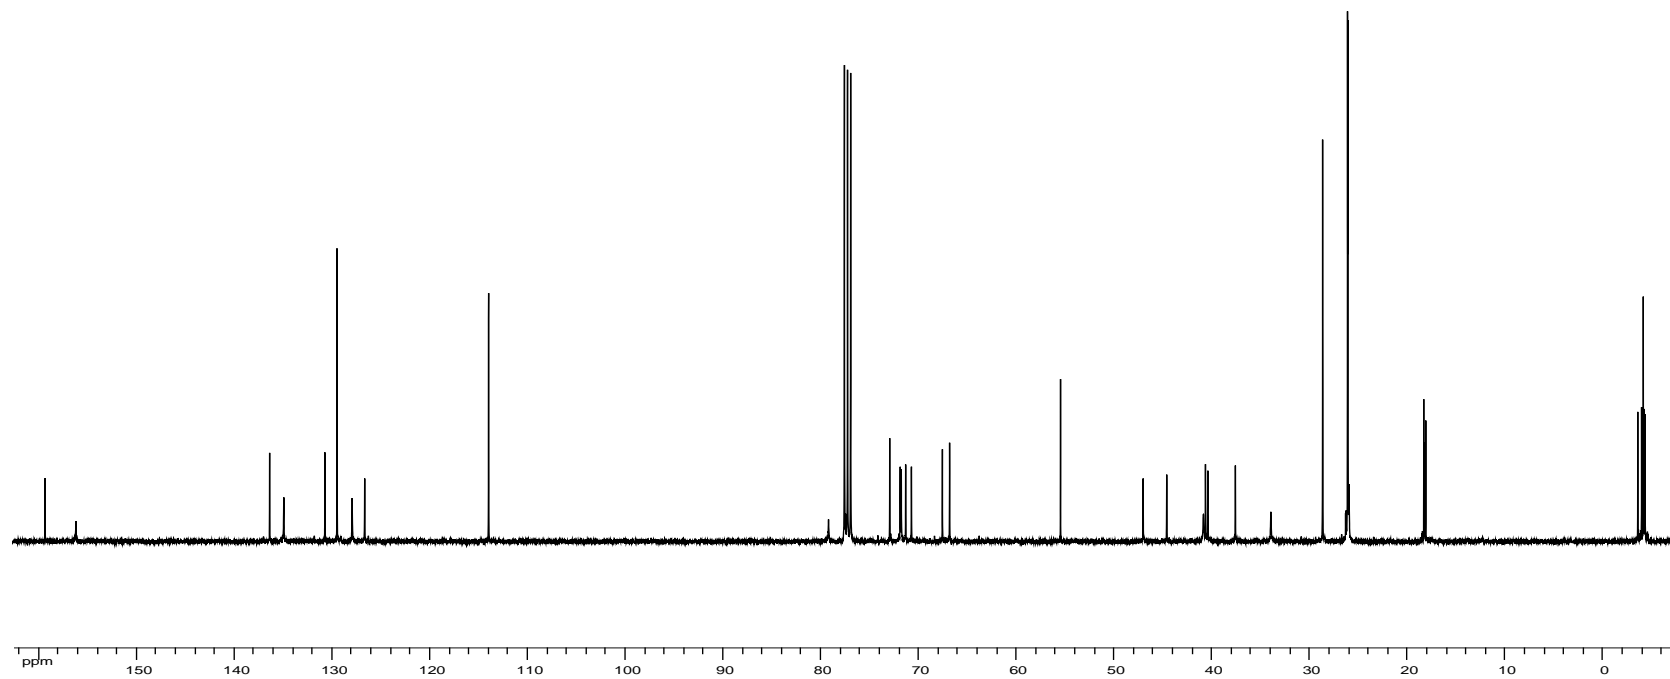

Supplement: NIHMS278779-supplement-2_si_002.pdf [file NIHMS278779-supplement-2_si_002.pdf]
